# Supplementary material
Source: PubMed Central journal article supplement (PMC2548314)
Supplement: NIHMS62477-supplement-si20070419_103.pdf [file NIHMS62477-supplement-si20070419_103.pdf]

Supporting information for

**Mechanistic Insight into N=N Cleavage by a Low-Coordinate  
Iron(II) Hydride Complex**

*Azwana R. Sadique, Elizabeth A. Gregory, William W. Brennessel, and*

*Patrick L. Holland*

|                                                                      |             |
|----------------------------------------------------------------------|-------------|
| Kinetic experiments                                                  | S-2         |
| Trapping and control experiments related to Scheme 3                 | S-4         |
| Table S1: Activation parameters                                      | S-5         |
| Figure S1: Eyring plot                                               | S-6         |
| Figure S2: Kinetic data in the presence of $L^{tBu}FeClK(solvent)_x$ | S-6         |
| Figure S3: Kinetic data in the presence of $L^{tBu}FeNPhNPh$         | S-7         |
| Figure S4: Kinetic data in the presence of $L^{tBu}FeCl$             | S-7         |
| Figure S5: Plot of vinyl % vs [hexyne]                               | S-8         |
| Figure S6: Mass spectra from crossover experiments                   | S-9         |
| Tables of Crystal data for $[L^{tBu}FeH]_2$                          | S-10 - S-27 |
| Tables of Crystal data for $L^{tBu}FeNPhNPh$                         | S-28 - S-32 |
| Details on reaction of $[L^{tBu}FeH]_2$ with $BEt_3$                 | S-33        |
| References                                                           | S-33        |

## Kinetic Experiments.

1. Thermolysis of  $L^{tBu}FeNPhNHPH$  at different temperatures. A J. Young resealable NMR tube was charged with  $L^{tBu}FeNPhNHPH$  (8.5 mg) and  $C_7D_8$  or  $C_6D_6$  (0.30 mL). The NMR tube was placed into the NMR probe, which was already equilibrated at the appropriate temperature (358 K unless otherwise specified). After the sample had equilibrated for 2 min,  $^1H$  NMR spectra were recorded at preset times using an automated program. Fourier transform, phasing, calibrating and integrating of each spectrum was done using MestReC. The plot of normalized  $L^{tBu}FeNPhNHPH$  concentration (y) vs. time (M0) was fit to the general, integrated equation:  $y = m1 + m2 \cdot \exp(-M0 \cdot M3)$ , where m1, m2 and M3 are variables, M3 being the first order rate constant. For this purpose, KaleidaGraph 3.51 was used. The error bars on the rate constant came either from the least-squares fit to the data (Method A) or the range of values seen in multiple experiments (Method B). Temperatures in the NMR probe were calibrated using 100% ethylene glycol.<sup>1</sup>

2. Thermolysis of  $L^{tBu}FeNPhNHPH$  in the presence of  $PhN=NPh$ . A solution of  $L^{tBu}FeNPhNHPH$  (10.0 mg),  $PhN=NPh$  (2.5 mg), and  $C_6D_6$  (0.30 mL) was heated to 358 K. First order rate constant obtained was  $7.0 \pm 0.1 \times 10^{-4} s^{-1}$ . Error estimation used Method A. Therefore, *added diazene does not inhibit the rate of the reaction.*

3. Thermolysis of  $L^{tBu}FeNPhNHPH$  in the presence of  $[L^{tBu}FeH]_2$ . A solution of  $L^{tBu}FeNPhNHPH$  (8.8 mg),  $[L^{tBu}FeH]_2$  (4.0 mg), and  $C_6D_6$  (0.30 mL) was heated to 358 K. First order rate constant obtained was  $5.3 \pm 0.7 \times 10^{-4} s^{-1}$ . Error estimation used Method B.

4. Thermolysis of  $L^{\text{tBu}}\text{FeNPhNHPH}$  in the presence of  $L^{\text{tBu}}\text{FeCl}$ . A solution of  $L^{\text{tBu}}\text{FeNPhNHPH}$  (8.3 mg),  $L^{\text{tBu}}\text{FeCl}$  (2.2 mg), and  $\text{C}_7\text{D}_8$  (0.30 mL) was heated to 315 K. Kinetic plot showed the presence of an induction period.

5. Thermolysis of  $L^{\text{tBu}}\text{FeNPhNHPH}$  in the presence of  $L^{\text{tBu}}\text{FeNPhNPh}$ . A solution of  $L^{\text{tBu}}\text{FeNPhNHPH}$  (8.1 mg),  $L^{\text{tBu}}\text{FeNPhNPh}$  (3.1 mg), and  $\text{C}_7\text{D}_8$  (0.30 mL) was heated to 315 K. Kinetic plot showed the absence of induction period.

6. Thermolysis of  $L^{\text{tBu}}\text{FeNPhNHPH}$  in the presence of  $L^{\text{tBu}}\text{FeKCl}(\text{solvent})_x$ . A solution of  $L^{\text{tBu}}\text{FeNPhNHPH}$  (8.0 mg) and  $L^{\text{tBu}}\text{FeKCl}(\text{solvent})_x$  (prepared *in situ* by reacting  $L^{\text{tBu}}\text{FeCl}$  (2.5 mg) with  $\text{KC}_8$  (0.6 mg) in  $\text{C}_7\text{D}_8$  (0.30 mL)<sup>2</sup>) was heated to 315 K. Kinetic plot showed the absence of induction period.

7. Thermolysis of  $L^{\text{tBu}}\text{FeNPhNHPH}$  in  $\text{THF-}d_8$ . A solution of  $L^{\text{tBu}}\text{FeNPhNHPH}$  (8.5 mg) and  $\text{THF-}d_8$  (0.3 mL) was heated to 352 K. First order rate constant obtained was  $4.6 \pm 0.2 \times 10^{-4} \text{ s}^{-1}$ . Error estimation used Method A.

8. Thermolysis of  $L^{\text{tBu}}\text{FeNPhNHPH}$  in the presence of lutidine. A solution of  $L^{\text{tBu}}\text{FeNPhNHPH}$  (10.0 mg), lutidine (1.6  $\mu\text{L}$ ), and  $\text{C}_6\text{D}_6$  (0.40 mL) was heated to 359 K. First order rate constant obtained was  $6.5 \pm 0.2 \times 10^{-4} \text{ s}^{-1}$ . Error estimation used Method A.

9. Thermolysis of  $L^{\text{tBu}}\text{FeNPhNHPH}$  in the presence of  $\text{Ph}_3\text{CH}$ . A solution of  $L^{\text{tBu}}\text{FeNPhNHPH}$  (3.0 mg),  $\text{Ph}_3\text{CH}$  (34 mg), and  $\text{C}_6\text{D}_6$  (0.30 mL) was heated to 358 K. First order rate constant obtained was  $9.8 \pm 0.3 \times 10^{-4} \text{ s}^{-1}$ . Error estimation used Method A.

10. Thermolysis of  $L^{\text{tBu}}\text{FeNPhNHPH}$  in the presence of DHA. A solution of  $L^{\text{tBu}}\text{FeNPhNHPH}$  (6.0 mg), DHA (19 mg), and  $\text{C}_6\text{D}_6$  (0.30 mL) was heated to 358 K. First order rate constant obtained was  $9.3 \pm 0.2 \times 10^{-4} \text{ s}^{-1}$ . Error estimation used Method A.

### Trapping and Control Experiments Related to Scheme 3

$L^{\text{tBu}}\text{FeNPhNHPH}$  and 3-hexyne (attempt to trap  $L\text{FeH}$ ). A J. Young resealable NMR tube was charged with  $L^{\text{tBu}}\text{FeNPhNHPH}$  (8.0 mg) and  $\text{C}_6\text{D}_6$  (0.20 mL). To this was added 3-hexyne (0.12 mL). The contents of the NMR tube were mixed for 10 minutes at room temperature and the  $^1\text{H}$  NMR spectrum was recorded. The paramagnetic components of the mixture were identical to that of  $L^{\text{tBu}}\text{FeNPhNHPH}$ . The  $^1\text{H}$  NMR spectrum was recorded after heating the contents at 80 °C for 2 h and it showed the presence of  $L^{\text{tBu}}\text{FeNHPH}$  (83%) and  $L^{\text{tBu}}\text{FeCEtCHEt}$  (17%). This amount of vinyl complex was independent of [hexyne] (see Figure S-5 below).

$L^{\text{tBu}}\text{FeCEtCHEt}$  and  $\text{PhN=NPh}$  (if trapping of  $L\text{FeH}$  was reversible, these would react). To test whether the formation of the vinyl complex is reversible,  $L^{\text{tBu}}\text{FeCEtCHEt}$  was prepared charging a J. Young resealable NMR tube with  $[L^{\text{tBu}}\text{FeH}]_2$  (14.0 mg),  $\text{C}_6\text{D}_6$  (0.3 mL), and 3-hexyne (3  $\mu\text{L}$ ).  $\text{PhN=NPh}$  (23 mg) was added to the NMR tube containing the vinyl compound.  $^1\text{H}$  NMR spectra were recorded after mixing the contents for 10 minutes at room temperature and after heating the contents at 80 °C for 2 h. The paramagnetic components of the mixture were identical to an experiment without  $\text{PhN=NPh}$ , showing that the vinyl complex does not revert to the hydride complex.

$L^{\text{tBu}}\text{FeNPhNHPH}$  and  $L^{\text{tBu}}\text{FeCEtCHEt}$  (another attempt to see any potential reversibility of attempted trapping experiment). A J. Young resealable NMR tube was

charged with  $L^{tBu}FeNPhNHPPh$  (5.3 mg) and  $C_6D_6$  (0.1 mL), A scintillation vial was charged with  $L^{tBu}FeCEtCHEt$  (4.6 mg) and  $C_6D_6$  (0.2 mL). The solution of the vinyl complex was added to the NMR tube containing the hydrazido complex, the contents were mixed well for 10 minutes at room temperature, and the  $^1H$  NMR spectrum was recorded. The NMR spectra showed only the presence of  $L^{tBu}FeNPhNHPPh$  and  $L^{tBu}FeCEtCHEt$ .

$L^{tBu}FeNPhNHPPh$ , 3-hexyne, and  $[L^{tBu}FeH]_2$  (showing branching ratio in Scheme 3). A J. Young resealable NMR tube was charged with  $[L^{tBu}FeH]_2$  (3.0 mg) and  $C_6D_6$  (0.1 mL). A scintillation vial was charged with  $L^{tBu}FeNPhNHPPh$  (8.0 mg),  $C_6D_6$  (0.1 mL), and 3-hexyne (1.2  $\mu$ L). This reaction mixture was added to the NMR tube, the contents were mixed well for 10 minutes at room temperature, and the  $^1H$  NMR spectrum was recorded. The  $^1H$  NMR spectrum showed the expected ratio of  $L^{tBu}FeNPhNHPPh$  and  $L^{tBu}FeCEtCHEt$  if all hydride complex had reacted only with 3-hexyne. The resultant mixture was heated at 80 °C for 2 h and the  $^1H$  NMR spectrum showed the presence of  $L^{tBu}FeCEtCHEt$  and  $L^{tBu}FeNHPPh$ .

**Table S1. Activation Parameters**

| T/ K | 1/T                     | k/ s <sup>-1</sup>       | ln k  | ln(k/T) |
|------|-------------------------|--------------------------|-------|---------|
| 363  | 2.75 x 10 <sup>-3</sup> | 13.27 x 10 <sup>-4</sup> | -6.62 | -12.52  |
| 352  | 2.84 x 10 <sup>-3</sup> | 6.93 x 10 <sup>-4</sup>  | -7.27 | -13.14  |
| 344  | 2.90 x 10 <sup>-3</sup> | 8.46 x 10 <sup>-4</sup>  | -7.07 | -12.92  |
| 338  | 2.95 x 10 <sup>-3</sup> | 3.01 x 10 <sup>-4</sup>  | -8.11 | -13.93  |
| 329  | 3.04 x 10 <sup>-3</sup> | 1.13 x 10 <sup>-4</sup>  | -9.09 | -14.88  |
| 315  | 3.18 x 10 <sup>-3</sup> | 0.70 x 10 <sup>-4</sup>  | -9.57 | -15.32  |

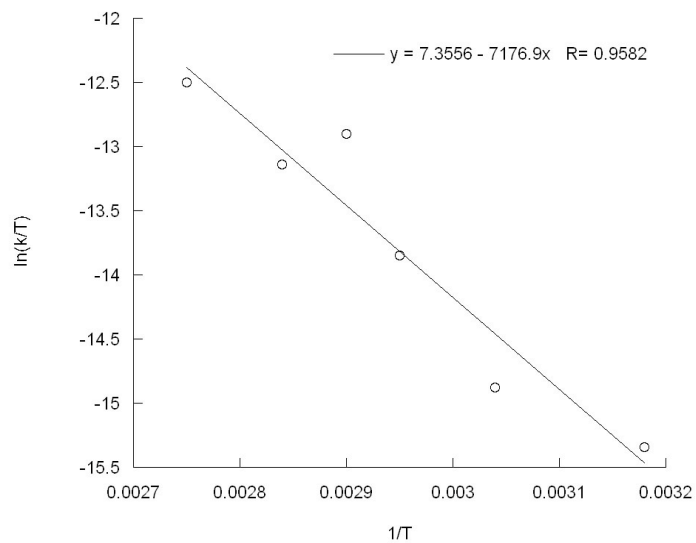

**Figure S-1.** Eyring plot for the reaction of  $L^{tBu}FeNPhNHPPh \rightarrow L^{tBu}FeNHPPh$ .

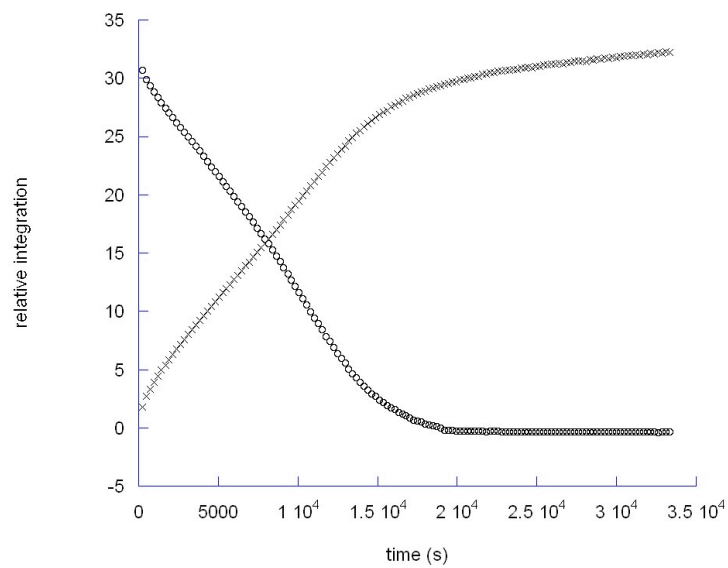

**Figure S-2.** Kinetic data for the conversion of  $L^{tBu}FeNPhNHPPh$  to  $L^{tBu}FeNHPPh$  in the presence of  $L^{tBu}FeClK(solvent)_x$  at 315 K: (o),  $[L^{tBu}FeNPhNHPPh]$ ; (x),  $[L^{tBu}FeNHPPh]$ .

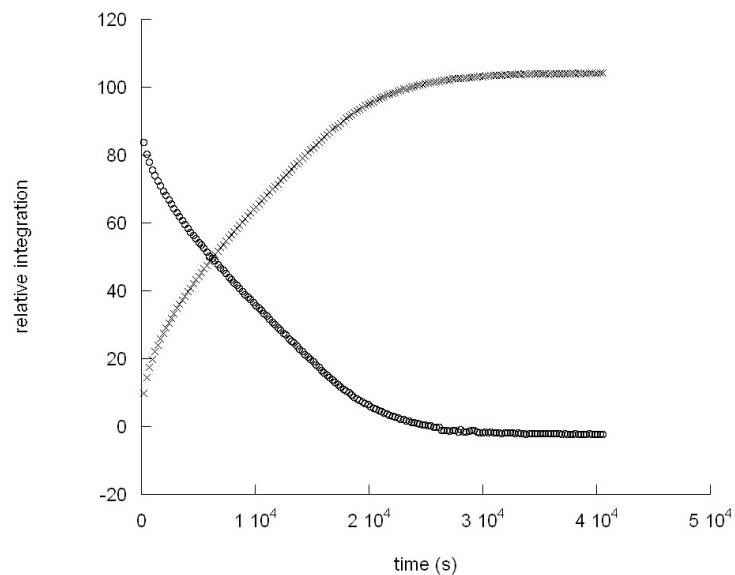

**Figure S-3.** Kinetic data for the conversion of  $L^{tBu}FeNPhNHPH$  to  $L^{tBu}FeNHPH$  in the presence of  $L^{tBu}FeNPhNHPH$  at 315 K: ( $\circ$ ),  $[L^{tBu}FeNPhNHPH]$ ; ( $\times$ ),  $[L^{tBu}FeNHPH]$ .

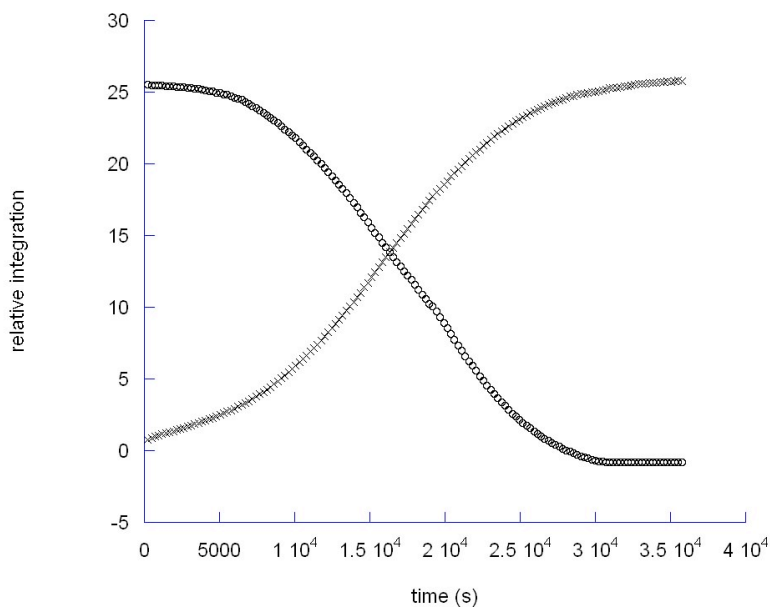

**Figure S-4.** Kinetic data for the conversion of  $L^{tBu}FeNPhNHPH$  to  $L^{tBu}FeNHPH$  in the presence of  $L^{tBu}FeCl$  at 315 K: ( $\circ$ ),  $[L^{tBu}FeNPhNHPH]$ ; ( $\times$ ),  $[L^{tBu}FeNHPH]$ .

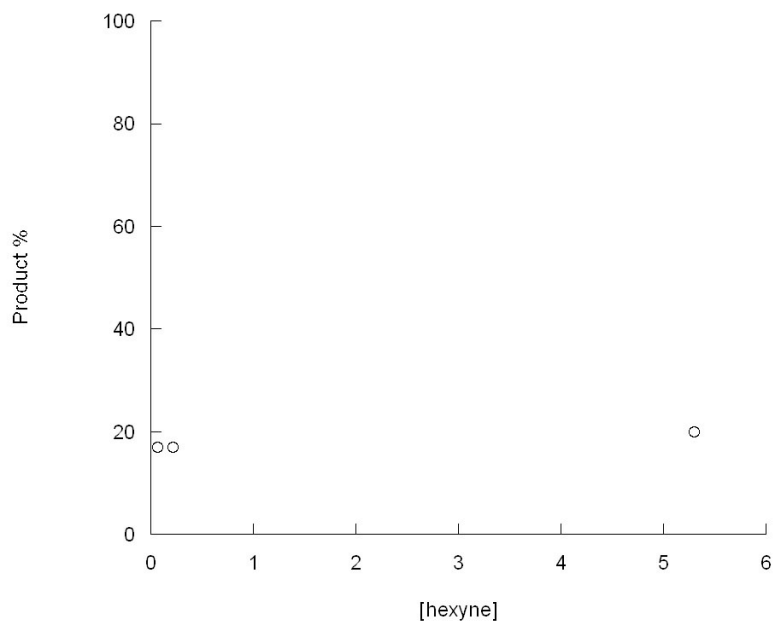

**Figure S-5.** In the decomposition of  $L^{\text{tBu}}\text{FeNPhNHPPh}$  with added 3-hexyne, a small amount of vinyl product is observed. This graph shows the amount of vinyl product vs the excess of [hexyne] (in M).



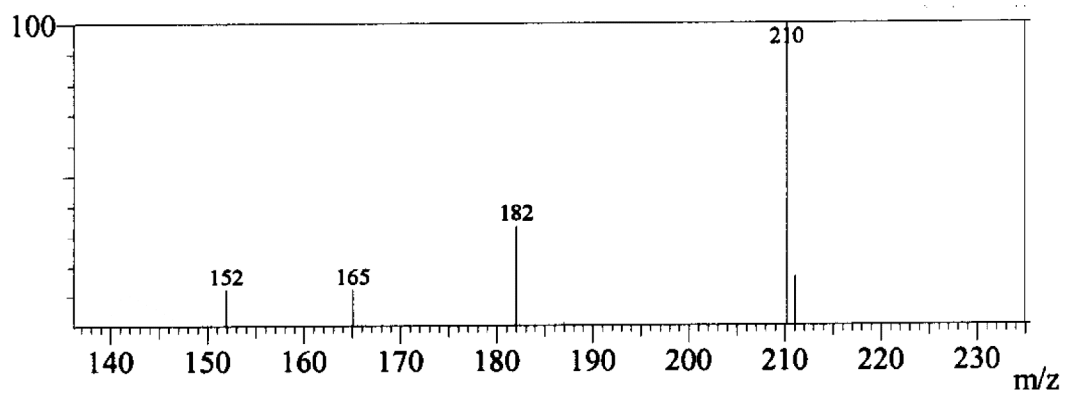

**Figure S-6a.** Mass spectrum of the organic byproducts from the crossover experiment.

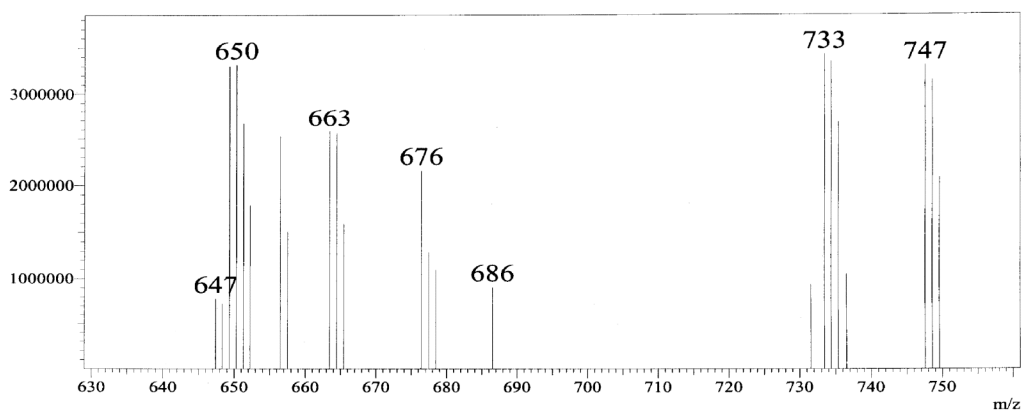

**Figure S-6b.** Mass spectrum of the products from the double crossover experiment.

**Table S2. Crystal data and structure refinement for [L<sup>tBu</sup>FeH]<sub>2</sub>**

|                                        |                                                                 |                            |
|----------------------------------------|-----------------------------------------------------------------|----------------------------|
| Identification code                    | holas09                                                         |                            |
| Empirical formula                      | C <sub>96</sub> H <sub>148</sub> Fe <sub>2</sub> N <sub>4</sub> |                            |
| Formula weight                         | 1469.88                                                         |                            |
| Temperature                            | 100.0(1) K                                                      |                            |
| Wavelength                             | 0.71073 Å                                                       |                            |
| Crystal system                         | Monoclinic                                                      |                            |
| Space group                            | C2/c                                                            |                            |
| Unit cell dimensions                   | $a = 50.910(3)$ Å                                               | $\alpha = 90^\circ$        |
|                                        | $b = 14.3387(9)$ Å                                              | $\beta = 123.668(1)^\circ$ |
|                                        | $c = 28.6998(18)$ Å                                             | $\gamma = 90^\circ$        |
| Volume                                 | 17436.1(19) Å <sup>3</sup>                                      |                            |
| Z                                      | 8                                                               |                            |
| Density (calculated)                   | 1.120 g/cm <sup>3</sup>                                         |                            |
| Absorption coefficient                 | 0.379 mm <sup>-1</sup>                                          |                            |
| $F(000)$                               | 6432                                                            |                            |
| Crystal color, morphology              | dark red, block                                                 |                            |
| Crystal size                           | 0.32 x 0.32 x 0.24 mm <sup>3</sup>                              |                            |
| Theta range for data collection        | 1.71 to 30.51°                                                  |                            |
| Index ranges                           | $-72 \leq h \leq 71, -20 \leq k \leq 20, -40 \leq l \leq 40$    |                            |
| Reflections collected                  | 134195                                                          |                            |
| Independent reflections                | 26222 [ $R(\text{int}) = 0.0332$ ]                              |                            |
| Observed reflections                   | 21241                                                           |                            |
| Completeness to $\theta = 30.51^\circ$ | 98.5%                                                           |                            |
| Absorption correction                  | Multi-scan                                                      |                            |
| Max. and min. transmission             | 0.9146 and 0.8884                                               |                            |
| Refinement method                      | Full-matrix least-squares on $F^2$                              |                            |
| Data / restraints / parameters         | 26222 / 15 / 978                                                |                            |
| Goodness-of-fit on $F^2$               | 1.017                                                           |                            |
| Final $R$ indices [ $I > 2\sigma(I)$ ] | $R1 = 0.0467, wR2 = 0.1235$                                     |                            |
| $R$ indices (all data)                 | $R1 = 0.0607, wR2 = 0.1328$                                     |                            |
| Largest diff. peak and hole            | 2.696 and -1.040 e.Å <sup>-3</sup>                              |                            |

**Table S3. Atomic coordinates ( $\times 10^4$ ) and equivalent isotropic displacement parameters ( $\text{\AA}^2 \times 10^3$ ) for  $[\text{L}^{\text{tBu}}\text{FeH}]_2$ .**

|      | x       | y        | z       | $U_{\text{eq}}$ |
|------|---------|----------|---------|-----------------|
| Fe1  | 1440(1) | 9034(1)  | 1037(1) | 16(1)           |
| Fe2  | 1195(1) | 9961(1)  | 140(1)  | 16(1)           |
| N11  | 1602(1) | 7732(1)  | 1187(1) | 16(1)           |
| N21  | 1395(1) | 9128(1)  | 1677(1) | 16(1)           |
| C11  | 1884(1) | 5692(1)  | 1498(1) | 25(1)           |
| C21  | 1396(1) | 5492(1)  | 1476(1) | 29(1)           |
| C31  | 1895(1) | 6093(1)  | 2335(1) | 32(1)           |
| C41  | 1685(1) | 6134(1)  | 1689(1) | 21(1)           |
| C51  | 1564(1) | 7165(1)  | 1515(1) | 17(1)           |
| C61  | 1408(1) | 7470(1)  | 1769(1) | 18(1)           |
| C71  | 1354(1) | 8359(1)  | 1899(1) | 17(1)           |
| C81  | 1226(1) | 8332(1)  | 2288(1) | 23(1)           |
| C91  | 1245(1) | 9223(1)  | 2604(1) | 26(1)           |
| C101 | 877(1)  | 8056(2)  | 1912(1) | 40(1)           |
| C111 | 1402(1) | 7575(2)  | 2747(1) | 48(1)           |
| C12  | 1762(1) | 7420(1)  | 927(1)  | 17(1)           |
| C22  | 2080(1) | 7659(1)  | 1164(1) | 19(1)           |
| C32  | 2237(1) | 7271(1)  | 936(1)  | 22(1)           |
| C42  | 2086(1) | 6686(1)  | 472(1)  | 23(1)           |
| C52  | 1765(1) | 6537(1)  | 215(1)  | 22(1)           |
| C62  | 1599(1) | 6883(1)  | 433(1)  | 18(1)           |
| C72  | 2259(1) | 8309(1)  | 1664(1) | 20(1)           |
| C82  | 2531(1) | 7804(1)  | 2178(1) | 35(1)           |
| C92  | 2379(1) | 9152(1)  | 1514(1) | 39(1)           |
| C102 | 1658(1) | 12595(1) | 2886(1) | 26(1)           |
| C112 | 1474(1) | 12613(1) | 3161(1) | 38(1)           |
| C122 | 1603(1) | 13473(1) | 2542(1) | 37(1)           |
| C132 | 890(1)  | 10584(1) | 1233(1) | 24(1)           |

|      |         |          |          |       |
|------|---------|----------|----------|-------|
| C142 | 639(1)  | 10677(2) | 1369(1)  | 35(1) |
| C152 | 816(1)  | 11295(1) | 776(1)   | 37(1) |
| C13  | 1454(1) | 10020(1) | 1950(1)  | 17(1) |
| C23  | 1759(1) | 10193(1) | 2431(1)  | 20(1) |
| C33  | 1817(1) | 11030(1) | 2720(1)  | 22(1) |
| C43  | 1587(1) | 11711(1) | 2544(1)  | 21(1) |
| C53  | 1294(1) | 11546(1) | 2053(1)  | 20(1) |
| C63  | 1222(1) | 10717(1) | 1750(1)  | 18(1) |
| C73  | 2030(1) | 9505(1)  | 2647(1)  | 26(1) |
| C83  | 2145(1) | 9137(2)  | 3232(1)  | 61(1) |
| C93  | 2304(1) | 9949(2)  | 2657(1)  | 49(1) |
| C103 | 2267(1) | 6209(1)  | 260(1)   | 29(1) |
| C113 | 2227(1) | 5149(1)  | 246(1)   | 37(1) |
| C123 | 2168(1) | 6570(2)  | -318(1)  | 38(1) |
| C133 | 1248(1) | 6670(1)  | 130(1)   | 20(1) |
| C143 | 1067(1) | 7295(1)  | -388(1)  | 26(1) |
| C153 | 1165(1) | 5650(1)  | -52(1)   | 28(1) |
| N14  | 1371(1) | 11048(1) | -67(1)   | 17(1) |
| N24  | 748(1)  | 10024(1) | -533(1)  | 17(1) |
| C14  | 1596(1) | 12673(1) | -482(1)  | 34(1) |
| C24  | 1071(1) | 12308(2) | -1319(1) | 37(1) |
| C34  | 1129(1) | 13435(1) | -598(1)  | 36(1) |
| C44  | 1250(1) | 12509(1) | -685(1)  | 24(1) |
| C54  | 1172(1) | 11677(1) | -428(1)  | 19(1) |
| C64  | 842(1)  | 11624(1) | -655(1)  | 21(1) |
| C74  | 641(1)  | 10892(1) | -739(1)  | 19(1) |
| C84  | 283(1)  | 11185(1) | -1098(1) | 25(1) |
| C94  | 240(1)  | 12046(2) | -828(1)  | 39(1) |
| C104 | 181(1)  | 11445(2) | -1692(1) | 42(1) |
| C114 | 46(1)   | 10459(2) | -1154(1) | 56(1) |
| C15  | 1709(1) | 11135(1) | 233(1)   | 17(1) |
| C25  | 1867(1) | 11707(1) | 711(1)   | 19(1) |
| C35  | 2194(1) | 11795(1) | 999(1)   | 20(1) |
| C45  | 2369(1) | 11343(1) | 830(1)   | 19(1) |
| C55  | 2208(1) | 10748(1) | 369(1)   | 19(1) |
| C65  | 1881(1) | 10625(1) | 70(1)    | 17(1) |

|      |         |          |          |       |
|------|---------|----------|----------|-------|
| C75  | 1694(1) | 12224(1) | 927(1)   | 29(1) |
| C85  | 1776(1) | 13266(1) | 1024(1)  | 42(1) |
| C95  | 1769(1) | 11772(2) | 1470(1)  | 46(1) |
| C105 | 2720(1) | 11541(1) | 1125(1)  | 21(1) |
| C115 | 2775(1) | 12243(1) | 785(1)   | 32(1) |
| C125 | 2921(1) | 10671(1) | 1252(1)  | 31(1) |
| C135 | 1721(1) | 9958(1)  | -425(1)  | 19(1) |
| C145 | 1805(1) | 8948(1)  | -223(1)  | 25(1) |
| C155 | 1805(1) | 10161(1) | -853(1)  | 28(1) |
| C16  | 558(1)  | 9216(1)  | -819(1)  | 16(1) |
| C26  | 436(1)  | 8660(1)  | -576(1)  | 16(1) |
| C36  | 245(1)  | 7901(1)  | -875(1)  | 19(1) |
| C46  | 176(1)  | 7655(1)  | -1403(1) | 21(1) |
| C56  | 313(1)  | 8184(1)  | -1620(1) | 21(1) |
| C66  | 506(1)  | 8956(1)  | -1340(1) | 18(1) |
| C76  | 511(1)  | 8842(1)  | 9(1)     | 18(1) |
| C86  | 745(1)  | 8109(1)  | 415(1)   | 22(1) |
| C96  | 221(1)  | 8842(1)  | 43(1)    | 27(1) |
| C106 | -38(1)  | 6835(1)  | -1723(1) | 26(1) |
| C116 | 70(1)   | 5934(1)  | -1379(1) | 33(1) |
| C126 | -381(1) | 7039(1)  | -1923(1) | 36(1) |
| C136 | 671(1)  | 9440(1)  | -1583(1) | 21(1) |
| C146 | 966(1)  | 8888(1)  | -1429(1) | 30(1) |
| C156 | 465(1)  | 9570(1)  | -2219(1) | 30(1) |
| C17  | 288(1)  | 6126(4)  | 820(2)   | 85(2) |
| C27  | 435(1)  | 5333(3)  | 699(2)   | 58(1) |
| C37  | 601(1)  | 4664(3)  | 1084(2)  | 69(1) |
| C47  | 740(2)  | 3921(3)  | 970(2)   | 88(2) |
| C57  | 698(1)  | 3879(3)  | 451(2)   | 71(1) |
| C67  | 530(1)  | 4537(3)  | 61(2)    | 73(1) |
| C77  | 401(1)  | 5256(4)  | 188(2)   | 69(1) |
| C17' | 757(4)  | 3834(11) | 259(7)   | 85(2) |
| C27' | 626(2)  | 4511(7)  | 538(4)   | 58(1) |
| C37' | 482(4)  | 5346(10) | 335(5)   | 69(1) |
| C47' | 404(4)  | 5949(10) | 640(5)   | 88(2) |
| C57' | 485(3)  | 5641(8)  | 1162(5)  | 71(1) |

|      |         |          |         |       |
|------|---------|----------|---------|-------|
| C67' | 651(3)  | 4846(9)  | 1402(5) | 73(1) |
| C77' | 721(4)  | 4274(11) | 1086(5) | 69(1) |
| C18  | 342(1)  | 6419(2)  | 2338(1) | 46(1) |
| C28  | 566(1)  | 5648(1)  | 2682(1) | 35(1) |
| C38  | 498(1)  | 5022(2)  | 2969(1) | 37(1) |
| C48  | 709(1)  | 4318(2)  | 3298(1) | 40(1) |
| C58  | 992(1)  | 4239(2)  | 3343(1) | 42(1) |
| C68  | 1062(1) | 4853(2)  | 3054(1) | 48(1) |
| C78  | 851(1)  | 5546(2)  | 2727(1) | 45(1) |

**Table S4.** Anisotropic displacement parameters ( $\text{\AA}^2 \times 10^3$ ) for  $[\text{L}^{\text{tBu}}\text{FeH}]_2$ . The anisotropic displacement factor exponent takes the form:  $-2\pi^2 [ h^2 a^{*2} U_{11} + \dots + 2 h k a^* b^* U_{12} ]$

|      | U <sub>11</sub> | U <sub>22</sub> | U <sub>33</sub> | U <sub>23</sub> | U <sub>13</sub> | U <sub>12</sub> |
|------|-----------------|-----------------|-----------------|-----------------|-----------------|-----------------|
| Fe1  | 15(1)           | 15(1)           | 17(1)           | -1(1)           | 10(1)           | -1(1)           |
| Fe2  | 13(1)           | 15(1)           | 17(1)           | -1(1)           | 6(1)            | -1(1)           |
| N11  | 13(1)           | 18(1)           | 15(1)           | -3(1)           | 7(1)            | -1(1)           |
| N21  | 15(1)           | 15(1)           | 17(1)           | -3(1)           | 8(1)            | -1(1)           |
| C11  | 25(1)           | 20(1)           | 26(1)           | 2(1)            | 12(1)           | 7(1)            |
| C21  | 31(1)           | 18(1)           | 35(1)           | -1(1)           | 18(1)           | -2(1)           |
| C31  | 33(1)           | 34(1)           | 20(1)           | 6(1)            | 9(1)            | 12(1)           |
| C41  | 21(1)           | 18(1)           | 19(1)           | 1(1)            | 8(1)            | 4(1)            |
| C51  | 14(1)           | 16(1)           | 15(1)           | -3(1)           | 4(1)            | -1(1)           |
| C61  | 18(1)           | 17(1)           | 18(1)           | 0(1)            | 9(1)            | -1(1)           |
| C71  | 13(1)           | 20(1)           | 14(1)           | -2(1)           | 6(1)            | -1(1)           |
| C81  | 28(1)           | 23(1)           | 23(1)           | -1(1)           | 18(1)           | 0(1)            |
| C91  | 31(1)           | 29(1)           | 22(1)           | -4(1)           | 18(1)           | -1(1)           |
| C101 | 36(1)           | 51(1)           | 50(1)           | -22(1)          | 34(1)           | -19(1)          |
| C111 | 85(2)           | 39(1)           | 44(1)           | 17(1)           | 51(1)           | 23(1)           |
| C12  | 15(1)           | 18(1)           | 16(1)           | -1(1)           | 7(1)            | 3(1)            |
| C22  | 15(1)           | 21(1)           | 17(1)           | -1(1)           | 8(1)            | 2(1)            |
| C32  | 16(1)           | 29(1)           | 20(1)           | -1(1)           | 9(1)            | 3(1)            |

|      |       |       |       |        |       |        |
|------|-------|-------|-------|--------|-------|--------|
| C42  | 20(1) | 29(1) | 21(1) | -1(1)  | 11(1) | 7(1)   |
| C52  | 20(1) | 24(1) | 17(1) | -4(1)  | 8(1)  | 5(1)   |
| C62  | 15(1) | 19(1) | 16(1) | -2(1)  | 6(1)  | 3(1)   |
| C72  | 15(1) | 24(1) | 18(1) | -3(1)  | 7(1)  | -2(1)  |
| C82  | 29(1) | 37(1) | 23(1) | -5(1)  | 3(1)  | 6(1)   |
| C92  | 48(1) | 37(1) | 32(1) | -8(1)  | 22(1) | -20(1) |
| C102 | 30(1) | 20(1) | 27(1) | -8(1)  | 15(1) | -3(1)  |
| C112 | 50(1) | 37(1) | 35(1) | -11(1) | 28(1) | -2(1)  |
| C122 | 49(1) | 19(1) | 39(1) | -6(1)  | 21(1) | -5(1)  |
| C132 | 19(1) | 25(1) | 21(1) | -3(1)  | 6(1)  | 5(1)   |
| C142 | 17(1) | 45(1) | 36(1) | -3(1)  | 10(1) | 5(1)   |
| C152 | 43(1) | 37(1) | 22(1) | 4(1)   | 11(1) | 14(1)  |
| C13  | 16(1) | 16(1) | 18(1) | -4(1)  | 10(1) | -2(1)  |
| C23  | 16(1) | 20(1) | 20(1) | -4(1)  | 9(1)  | -2(1)  |
| C33  | 20(1) | 22(1) | 22(1) | -6(1)  | 11(1) | -5(1)  |
| C43  | 26(1) | 17(1) | 23(1) | -5(1)  | 16(1) | -4(1)  |
| C53  | 23(1) | 18(1) | 23(1) | -2(1)  | 14(1) | 1(1)   |
| C63  | 18(1) | 19(1) | 18(1) | -2(1)  | 10(1) | 0(1)   |
| C73  | 17(1) | 25(1) | 28(1) | -7(1)  | 6(1)  | 0(1)   |
| C83  | 54(1) | 74(2) | 44(1) | 24(1)  | 20(1) | 39(1)  |
| C93  | 25(1) | 34(1) | 90(2) | -18(1) | 32(1) | -5(1)  |
| C103 | 23(1) | 40(1) | 27(1) | -5(1)  | 15(1) | 7(1)   |
| C113 | 38(1) | 38(1) | 41(1) | 2(1)   | 26(1) | 16(1)  |
| C123 | 46(1) | 44(1) | 38(1) | 0(1)   | 31(1) | 9(1)   |
| C133 | 15(1) | 20(1) | 18(1) | -4(1)  | 6(1)  | 2(1)   |
| C143 | 21(1) | 27(1) | 20(1) | -1(1)  | 6(1)  | 7(1)   |
| C153 | 25(1) | 23(1) | 26(1) | -6(1)  | 8(1)  | -2(1)  |
| N14  | 16(1) | 17(1) | 19(1) | -4(1)  | 10(1) | -2(1)  |
| N24  | 14(1) | 16(1) | 17(1) | -2(1)  | 7(1)  | -1(1)  |
| C14  | 33(1) | 28(1) | 48(1) | 12(1)  | 27(1) | 0(1)   |
| C24  | 46(1) | 40(1) | 30(1) | 6(1)   | 25(1) | 1(1)   |
| C34  | 47(1) | 17(1) | 57(1) | 3(1)   | 37(1) | 2(1)   |
| C44  | 30(1) | 18(1) | 31(1) | 3(1)   | 21(1) | 2(1)   |
| C54  | 22(1) | 16(1) | 21(1) | -3(1)  | 13(1) | -1(1)  |
| C64  | 21(1) | 16(1) | 23(1) | 1(1)   | 11(1) | 3(1)   |
| C74  | 16(1) | 19(1) | 18(1) | -1(1)  | 8(1)  | 2(1)   |

|      |       |       |        |        |       |        |
|------|-------|-------|--------|--------|-------|--------|
| C84  | 17(1) | 23(1) | 28(1)  | 4(1)   | 9(1)  | 5(1)   |
| C94  | 27(1) | 48(1) | 34(1)  | -4(1)  | 13(1) | 16(1)  |
| C104 | 29(1) | 59(1) | 25(1)  | 3(1)   | 7(1)  | 17(1)  |
| C114 | 17(1) | 38(1) | 97(2)  | 27(1)  | 22(1) | 10(1)  |
| C15  | 16(1) | 17(1) | 17(1)  | -2(1)  | 10(1) | -3(1)  |
| C25  | 21(1) | 19(1) | 20(1)  | -6(1)  | 14(1) | -6(1)  |
| C35  | 22(1) | 22(1) | 17(1)  | -7(1)  | 11(1) | -8(1)  |
| C45  | 18(1) | 22(1) | 15(1)  | -1(1)  | 8(1)  | -4(1)  |
| C55  | 17(1) | 23(1) | 16(1)  | -2(1)  | 9(1)  | -1(1)  |
| C65  | 18(1) | 18(1) | 15(1)  | -2(1)  | 9(1)  | -2(1)  |
| C75  | 24(1) | 35(1) | 32(1)  | -19(1) | 19(1) | -10(1) |
| C85  | 41(1) | 34(1) | 51(1)  | -22(1) | 26(1) | -6(1)  |
| C95  | 52(1) | 65(1) | 40(1)  | -22(1) | 38(1) | -27(1) |
| C105 | 17(1) | 29(1) | 16(1)  | -3(1)  | 7(1)  | -5(1)  |
| C115 | 23(1) | 45(1) | 24(1)  | 1(1)   | 12(1) | -11(1) |
| C125 | 20(1) | 38(1) | 26(1)  | -5(1)  | 7(1)  | 1(1)   |
| C135 | 16(1) | 21(1) | 16(1)  | -4(1)  | 7(1)  | 0(1)   |
| C145 | 29(1) | 20(1) | 22(1)  | -3(1)  | 12(1) | -1(1)  |
| C155 | 35(1) | 32(1) | 17(1)  | -4(1)  | 14(1) | -4(1)  |
| C16  | 11(1) | 18(1) | 14(1)  | -1(1)  | 3(1)  | 0(1)   |
| C26  | 12(1) | 20(1) | 13(1)  | -2(1)  | 4(1)  | 1(1)   |
| C36  | 16(1) | 22(1) | 17(1)  | -2(1)  | 7(1)  | -3(1)  |
| C46  | 17(1) | 23(1) | 16(1)  | -5(1)  | 6(1)  | -4(1)  |
| C56  | 18(1) | 25(1) | 15(1)  | -4(1)  | 6(1)  | -3(1)  |
| C66  | 14(1) | 21(1) | 15(1)  | 0(1)   | 6(1)  | 0(1)   |
| C76  | 15(1) | 21(1) | 14(1)  | -2(1)  | 6(1)  | 1(1)   |
| C86  | 18(1) | 26(1) | 16(1)  | 0(1)   | 6(1)  | 2(1)   |
| C96  | 19(1) | 42(1) | 21(1)  | -2(1)  | 11(1) | 5(1)   |
| C106 | 25(1) | 28(1) | 20(1)  | -8(1)  | 10(1) | -10(1) |
| C116 | 35(1) | 24(1) | 35(1)  | -7(1)  | 17(1) | -6(1)  |
| C126 | 22(1) | 36(1) | 34(1)  | -7(1)  | 6(1)  | -10(1) |
| C136 | 19(1) | 24(1) | 18(1)  | -1(1)  | 9(1)  | -2(1)  |
| C146 | 20(1) | 37(1) | 32(1)  | 5(1)   | 14(1) | 1(1)   |
| C156 | 26(1) | 41(1) | 19(1)  | 4(1)   | 11(1) | 0(1)   |
| C17  | 99(4) | 75(3) | 101(4) | -34(3) | 69(3) | -28(3) |
| C27  | 56(2) | 60(2) | 56(2)  | -8(2)  | 29(2) | -23(2) |



|      |        |       |        |        |       |        |
|------|--------|-------|--------|--------|-------|--------|
| C37  | 80(2)  | 64(2) | 53(2)  | 0(1)   | 31(2) | -19(2) |
| C47  | 102(4) | 56(2) | 64(3)  | 5(2)   | 20(3) | -11(3) |
| C57  | 72(3)  | 47(2) | 87(3)  | -6(2)  | 39(2) | -9(2)  |
| C67  | 90(3)  | 76(3) | 56(2)  | 1(2)   | 43(2) | -13(2) |
| C77  | 80(2)  | 64(2) | 53(2)  | 0(1)   | 31(2) | -19(2) |
| C17' | 99(4)  | 75(3) | 101(4) | -34(3) | 69(3) | -28(3) |
| C27' | 56(2)  | 60(2) | 56(2)  | -8(2)  | 29(2) | -23(2) |
| C37' | 80(2)  | 64(2) | 53(2)  | 0(1)   | 31(2) | -19(2) |
| C47' | 102(4) | 56(2) | 64(3)  | 5(2)   | 20(3) | -11(3) |
| C57' | 72(3)  | 47(2) | 87(3)  | -6(2)  | 39(2) | -9(2)  |
| C67' | 90(3)  | 76(3) | 56(2)  | 1(2)   | 43(2) | -13(2) |
| C77' | 80(2)  | 64(2) | 53(2)  | 0(1)   | 31(2) | -19(2) |
| C18  | 48(1)  | 34(1) | 51(1)  | 5(1)   | 24(1) | 0(1)   |
| C28  | 36(1)  | 31(1) | 35(1)  | -6(1)  | 16(1) | -5(1)  |
| C38  | 31(1)  | 47(1) | 30(1)  | 2(1)   | 15(1) | 1(1)   |
| C48  | 39(1)  | 50(1) | 32(1)  | 6(1)   | 19(1) | 5(1)   |
| C58  | 39(1)  | 45(1) | 36(1)  | -2(1)  | 18(1) | 7(1)   |
| C68  | 40(1)  | 45(1) | 66(2)  | -6(1)  | 33(1) | -2(1)  |
| C78  | 48(1)  | 34(1) | 62(1)  | -3(1)  | 35(1) | -7(1)  |

---

**Table S5. Bond lengths [ $\text{\AA}$ ] and angles [ $^\circ$ ] for  $[\text{L}^{\text{tBu}}\text{FeH}]_2$**

|             |            |              |            |
|-------------|------------|--------------|------------|
| Fe(1)-N(21) | 1.9780(12) | N(21)-C(13)  | 1.4418(17) |
| Fe(1)-N(11) | 1.9885(12) | C(11)-C(41)  | 1.535(2)   |
| Fe(1)-Fe(2) | 2.5292(3)  | C(11)-H(11A) | 0.9800     |
| Fe(1)-H(1)  | 1.48(2)    | C(11)-H(11B) | 0.9800     |
| Fe(1)-H(2)  | 1.58(2)    | C(11)-H(11C) | 0.9800     |
| Fe(2)-N(24) | 2.0097(12) | C(21)-C(41)  | 1.545(2)   |
| Fe(2)-N(14) | 2.0429(12) | C(21)-H(21A) | 0.9800     |
| Fe(2)-H(1)  | 1.49(2)    | C(21)-H(21B) | 0.9800     |
| Fe(2)-H(2)  | 1.70(2)    | C(21)-H(21C) | 0.9800     |
| N(11)-C(51) | 1.3369(18) | C(31)-C(41)  | 1.545(2)   |
| N(11)-C(12) | 1.4468(17) | C(31)-H(31A) | 0.9800     |
| N(21)-C(71) | 1.3455(18) | C(31)-H(31B) | 0.9800     |

|               |            |               |            |
|---------------|------------|---------------|------------|
| C(31)-H(31C)  | 0.9800     | C(92)-H(92B)  | 0.9800     |
| C(41)-C(51)   | 1.572(2)   | C(92)-H(92C)  | 0.9800     |
| C(51)-C(61)   | 1.416(2)   | C(102)-C(43)  | 1.519(2)   |
| C(61)-C(71)   | 1.3964(19) | C(102)-C(112) | 1.523(3)   |
| C(61)-H(61)   | 0.9500     | C(102)-C(122) | 1.527(3)   |
| C(71)-C(81)   | 1.573(2)   | C(102)-H(102) | 1.0000     |
| C(81)-C(101)  | 1.532(2)   | C(112)-H(11J) | 0.9800     |
| C(81)-C(91)   | 1.539(2)   | C(112)-H(11K) | 0.9800     |
| C(81)-C(111)  | 1.553(3)   | C(112)-H(11L) | 0.9800     |
| C(91)-H(91A)  | 0.9800     | C(122)-H(12G) | 0.9800     |
| C(91)-H(91B)  | 0.9800     | C(122)-H(12H) | 0.9800     |
| C(91)-H(91C)  | 0.9800     | C(122)-H(12I) | 0.9800     |
| C(101)-H(10A) | 0.9800     | C(132)-C(63)  | 1.518(2)   |
| C(101)-H(10B) | 0.9800     | C(132)-C(152) | 1.534(2)   |
| C(101)-H(10C) | 0.9800     | C(132)-C(142) | 1.538(2)   |
| C(111)-H(11P) | 0.9800     | C(132)-H(132) | 1.0000     |
| C(111)-H(11Q) | 0.9800     | C(142)-H(14M) | 0.9800     |
| C(111)-H(11R) | 0.9800     | C(142)-H(14N) | 0.9800     |
| C(12)-C(22)   | 1.4045(19) | C(142)-H(14O) | 0.9800     |
| C(12)-C(62)   | 1.4083(19) | C(152)-H(15J) | 0.9800     |
| C(22)-C(32)   | 1.400(2)   | C(152)-H(15K) | 0.9800     |
| C(22)-C(72)   | 1.520(2)   | C(152)-H(15L) | 0.9800     |
| C(32)-C(42)   | 1.390(2)   | C(13)-C(63)   | 1.4074(19) |
| C(32)-H(32)   | 0.9500     | C(13)-C(23)   | 1.4134(19) |
| C(42)-C(52)   | 1.390(2)   | C(23)-C(33)   | 1.393(2)   |
| C(42)-C(103)  | 1.518(2)   | C(23)-C(73)   | 1.521(2)   |
| C(52)-C(62)   | 1.392(2)   | C(33)-C(43)   | 1.385(2)   |
| C(52)-H(52)   | 0.9500     | C(33)-H(33)   | 0.9500     |
| C(62)-C(133)  | 1.5214(19) | C(43)-C(53)   | 1.394(2)   |
| C(72)-C(92)   | 1.521(2)   | C(53)-C(63)   | 1.396(2)   |
| C(72)-C(82)   | 1.533(2)   | C(53)-H(53)   | 0.9500     |
| C(72)-H(72)   | 1.0000     | C(73)-C(93)   | 1.515(3)   |
| C(82)-H(82A)  | 0.9800     | C(73)-C(83)   | 1.534(3)   |
| C(82)-H(82B)  | 0.9800     | C(73)-H(73)   | 1.0000     |
| C(82)-H(82C)  | 0.9800     | C(83)-H(83A)  | 0.9800     |
| C(92)-H(92A)  | 0.9800     | C(83)-H(83B)  | 0.9800     |

|               |            |               |            |
|---------------|------------|---------------|------------|
| C(83)-H(83C)  | 0.9800     | C(34)-H(34B)  | 0.9800     |
| C(93)-H(93A)  | 0.9800     | C(34)-H(34C)  | 0.9800     |
| C(93)-H(93B)  | 0.9800     | C(44)-C(54)   | 1.565(2)   |
| C(93)-H(93C)  | 0.9800     | C(54)-C(64)   | 1.427(2)   |
| C(103)-C(113) | 1.531(3)   | C(64)-C(74)   | 1.392(2)   |
| C(103)-C(123) | 1.532(3)   | C(64)-H(64)   | 0.9500     |
| C(103)-H(103) | 1.0000     | C(74)-C(84)   | 1.574(2)   |
| C(113)-H(11M) | 0.9800     | C(84)-C(104)  | 1.528(3)   |
| C(113)-H(11N) | 0.9800     | C(84)-C(114)  | 1.531(3)   |
| C(113)-H(11O) | 0.9800     | C(84)-C(94)   | 1.536(2)   |
| C(123)-H(12J) | 0.9800     | C(94)-H(94A)  | 0.9800     |
| C(123)-H(12K) | 0.9800     | C(94)-H(94B)  | 0.9800     |
| C(123)-H(12L) | 0.9800     | C(94)-H(94C)  | 0.9800     |
| C(133)-C(143) | 1.530(2)   | C(104)-H(10D) | 0.9800     |
| C(133)-C(153) | 1.531(2)   | C(104)-H(10E) | 0.9800     |
| C(133)-H(133) | 1.0000     | C(104)-H(10F) | 0.9800     |
| C(143)-H(14D) | 0.9800     | C(114)-H(11S) | 0.9800     |
| C(143)-H(14E) | 0.9800     | C(114)-H(11T) | 0.9800     |
| C(143)-H(14F) | 0.9800     | C(114)-H(11U) | 0.9800     |
| C(153)-H(15D) | 0.9800     | C(15)-C(65)   | 1.4061(19) |
| C(153)-H(15E) | 0.9800     | C(15)-C(25)   | 1.4076(19) |
| C(153)-H(15F) | 0.9800     | C(25)-C(35)   | 1.397(2)   |
| N(14)-C(54)   | 1.3235(19) | C(25)-C(75)   | 1.520(2)   |
| N(14)-C(15)   | 1.4391(17) | C(35)-C(45)   | 1.389(2)   |
| N(24)-C(74)   | 1.3571(18) | C(35)-H(35)   | 0.9500     |
| N(24)-C(16)   | 1.4392(17) | C(45)-C(55)   | 1.3951(19) |
| C(14)-C(44)   | 1.535(2)   | C(45)-C(105)  | 1.520(2)   |
| C(14)-H(14J)  | 0.9800     | C(55)-C(65)   | 1.3952(19) |
| C(14)-H(14K)  | 0.9800     | C(55)-H(55)   | 0.9500     |
| C(14)-H(14L)  | 0.9800     | C(65)-C(135)  | 1.5216(19) |
| C(24)-C(44)   | 1.543(2)   | C(75)-C(95)   | 1.529(3)   |
| C(24)-H(24A)  | 0.9800     | C(75)-C(85)   | 1.535(3)   |
| C(24)-H(24B)  | 0.9800     | C(75)-H(75)   | 1.0000     |
| C(24)-H(24C)  | 0.9800     | C(85)-H(85A)  | 0.9800     |
| C(34)-C(44)   | 1.542(2)   | C(85)-H(85B)  | 0.9800     |
| C(34)-H(34A)  | 0.9800     | C(85)-H(85C)  | 0.9800     |

|               |            |               |          |
|---------------|------------|---------------|----------|
| C(95)-H(95A)  | 0.9800     | C(86)-H(86B)  | 0.9800   |
| C(95)-H(95B)  | 0.9800     | C(86)-H(86C)  | 0.9800   |
| C(95)-H(95C)  | 0.9800     | C(96)-H(96A)  | 0.9800   |
| C(105)-C(125) | 1.524(2)   | C(96)-H(96B)  | 0.9800   |
| C(105)-C(115) | 1.533(2)   | C(96)-H(96C)  | 0.9800   |
| C(105)-H(105) | 1.0000     | C(106)-C(116) | 1.530(3) |
| C(115)-H(11D) | 0.9800     | C(106)-C(126) | 1.534(2) |
| C(115)-H(11E) | 0.9800     | C(106)-H(106) | 1.0000   |
| C(115)-H(11F) | 0.9800     | C(116)-H(11G) | 0.9800   |
| C(125)-H(12D) | 0.9800     | C(116)-H(11H) | 0.9800   |
| C(125)-H(12E) | 0.9800     | C(116)-H(11I) | 0.9800   |
| C(125)-H(12F) | 0.9800     | C(126)-H(12A) | 0.9800   |
| C(135)-C(145) | 1.530(2)   | C(126)-H(12B) | 0.9800   |
| C(135)-C(155) | 1.533(2)   | C(126)-H(12C) | 0.9800   |
| C(135)-H(135) | 1.0000     | C(136)-C(156) | 1.530(2) |
| C(145)-H(14A) | 0.9800     | C(136)-C(146) | 1.530(2) |
| C(145)-H(14B) | 0.9800     | C(136)-H(136) | 1.0000   |
| C(145)-H(14C) | 0.9800     | C(146)-H(14G) | 0.9800   |
| C(155)-H(15A) | 0.9800     | C(146)-H(14H) | 0.9800   |
| C(155)-H(15B) | 0.9800     | C(146)-H(14I) | 0.9800   |
| C(155)-H(15C) | 0.9800     | C(156)-H(15G) | 0.9800   |
| C(16)-C(26)   | 1.410(2)   | C(156)-H(15H) | 0.9800   |
| C(16)-C(66)   | 1.4162(19) | C(156)-H(15I) | 0.9800   |
| C(26)-C(36)   | 1.3923(19) | C(17)-C(27)   | 1.504(6) |
| C(26)-C(76)   | 1.5232(19) | C(17)-H(17A)  | 0.9800   |
| C(36)-C(46)   | 1.397(2)   | C(17)-H(17B)  | 0.9800   |
| C(36)-H(36)   | 0.9500     | C(17)-H(17C)  | 0.9800   |
| C(46)-C(56)   | 1.390(2)   | C(27)-C(37)   | 1.348(6) |
| C(46)-C(106)  | 1.520(2)   | C(27)-C(77)   | 1.384(6) |
| C(56)-C(66)   | 1.399(2)   | C(37)-C(47)   | 1.412(8) |
| C(56)-H(56)   | 0.9500     | C(37)-H(37)   | 0.9500   |
| C(66)-C(136)  | 1.526(2)   | C(47)-C(57)   | 1.383(8) |
| C(76)-C(86)   | 1.531(2)   | C(47)-H(47)   | 0.9500   |
| C(76)-C(96)   | 1.536(2)   | C(57)-C(67)   | 1.346(6) |
| C(76)-H(76)   | 1.0000     | C(57)-H(57)   | 0.9500   |
| C(86)-H(86A)  | 0.9800     | C(67)-C(77)   | 1.375(7) |

|                   |           |                     |            |
|-------------------|-----------|---------------------|------------|
| C(67)-H(67)       | 0.9500    | N(11)-Fe(1)-H(1)    | 105.7(8)   |
| C(77)-H(77)       | 0.9500    | Fe(2)-Fe(1)-H(1)    | 31.7(8)    |
| C(17')-C(27')     | 1.620(13) | N(21)-Fe(1)-H(2)    | 91.2(7)    |
| C(17')-H(17D)     | 0.9800    | N(11)-Fe(1)-H(2)    | 166.7(7)   |
| C(17')-H(17E)     | 0.9800    | Fe(2)-Fe(1)-H(2)    | 41.2(7)    |
| C(17')-H(17F)     | 0.9800    | H(1)-Fe(1)-H(2)     | 68.3(11)   |
| C(27')-C(37')     | 1.355(15) | N(24)-Fe(2)-N(14)   | 97.60(5)   |
| C(27')-C(77')     | 1.404(14) | N(24)-Fe(2)-Fe(1)   | 131.17(4)  |
| C(37')-C(47')     | 1.432(16) | N(14)-Fe(2)-Fe(1)   | 130.43(4)  |
| C(37')-H(37')     | 0.9500    | N(24)-Fe(2)-H(1)    | 147.5(8)   |
| C(47')-C(57')     | 1.388(15) | N(14)-Fe(2)-H(1)    | 109.6(8)   |
| C(47')-H(47')     | 0.9500    | Fe(1)-Fe(2)-H(1)    | 31.5(8)    |
| C(57')-C(67')     | 1.356(14) | N(24)-Fe(2)-H(2)    | 117.5(7)   |
| C(57')-H(57')     | 0.9500    | N(14)-Fe(2)-H(2)    | 117.9(7)   |
| C(67')-C(77')     | 1.411(15) | Fe(1)-Fe(2)-H(2)    | 37.8(7)    |
| C(67')-H(67')     | 0.9500    | H(1)-Fe(2)-H(2)     | 65.0(10)   |
| C(77')-H(77')     | 0.9500    | C(51)-N(11)-C(12)   | 121.14(12) |
| C(18)-C(28)       | 1.502(3)  | C(51)-N(11)-Fe(1)   | 121.19(9)  |
| C(18)-H(18A)      | 0.9800    | C(12)-N(11)-Fe(1)   | 117.68(9)  |
| C(18)-H(18B)      | 0.9800    | C(71)-N(21)-C(13)   | 120.71(12) |
| C(18)-H(18C)      | 0.9800    | C(71)-N(21)-Fe(1)   | 120.77(9)  |
| C(28)-C(38)       | 1.387(3)  | C(13)-N(21)-Fe(1)   | 117.89(9)  |
| C(28)-C(78)       | 1.389(3)  | C(41)-C(11)-H(11A)  | 109.5      |
| C(38)-C(48)       | 1.392(3)  | C(41)-C(11)-H(11B)  | 109.5      |
| C(38)-H(38A)      | 0.9500    | H(11A)-C(11)-H(11B) | 109.5      |
| C(48)-C(58)       | 1.377(3)  | C(41)-C(11)-H(11C)  | 109.5      |
| C(48)-H(48A)      | 0.9500    | H(11A)-C(11)-H(11C) | 109.5      |
| C(58)-C(68)       | 1.385(3)  | H(11B)-C(11)-H(11C) | 109.5      |
| C(58)-H(58A)      | 0.9500    | C(41)-C(21)-H(21A)  | 109.5      |
| C(68)-C(78)       | 1.382(3)  | C(41)-C(21)-H(21B)  | 109.5      |
| C(68)-H(68A)      | 0.9500    | H(21A)-C(21)-H(21B) | 109.5      |
| C(78)-H(78A)      | 0.9500    | C(41)-C(21)-H(21C)  | 109.5      |
| N(21)-Fe(1)-N(11) | 96.41(5)  | H(21A)-C(21)-H(21C) | 109.5      |
| N(21)-Fe(1)-Fe(2) | 131.62(4) | H(21B)-C(21)-H(21C) | 109.5      |
| N(11)-Fe(1)-Fe(2) | 128.63(3) | C(41)-C(31)-H(31A)  | 109.5      |
| N(21)-Fe(1)-H(1)  | 157.1(8)  | C(41)-C(31)-H(31B)  | 109.5      |

|                      |            |                      |            |
|----------------------|------------|----------------------|------------|
| H(31A)-C(31)-H(31B)  | 109.5      | H(10B)-C(101)-H(10C) | 109.5      |
| C(41)-C(31)-H(31C)   | 109.5      | C(81)-C(111)-H(11P)  | 109.5      |
| H(31A)-C(31)-H(31C)  | 109.5      | C(81)-C(111)-H(11Q)  | 109.5      |
| H(31B)-C(31)-H(31C)  | 109.5      | H(11P)-C(111)-H(11Q) | 109.5      |
| C(11)-C(41)-C(21)    | 106.72(13) | C(81)-C(111)-H(11R)  | 109.5      |
| C(11)-C(41)-C(31)    | 104.90(13) | H(11P)-C(111)-H(11R) | 109.5      |
| C(21)-C(41)-C(31)    | 109.01(14) | H(11Q)-C(111)-H(11R) | 109.5      |
| C(11)-C(41)-C(51)    | 119.58(13) | C(22)-C(12)-C(62)    | 119.96(13) |
| C(21)-C(41)-C(51)    | 108.48(12) | C(22)-C(12)-N(11)    | 119.96(12) |
| C(31)-C(41)-C(51)    | 107.79(12) | C(62)-C(12)-N(11)    | 120.08(12) |
| N(11)-C(51)-C(61)    | 121.17(13) | C(32)-C(22)-C(12)    | 118.61(13) |
| N(11)-C(51)-C(41)    | 127.80(13) | C(32)-C(22)-C(72)    | 119.03(13) |
| C(61)-C(51)-C(41)    | 111.00(12) | C(12)-C(22)-C(72)    | 122.35(12) |
| C(71)-C(61)-C(51)    | 132.02(13) | C(42)-C(32)-C(22)    | 122.26(14) |
| C(71)-C(61)-H(61)    | 114.0      | C(42)-C(32)-H(32)    | 118.9      |
| C(51)-C(61)-H(61)    | 114.0      | C(22)-C(32)-H(32)    | 118.9      |
| N(21)-C(71)-C(61)    | 121.07(13) | C(32)-C(42)-C(52)    | 117.54(13) |
| N(21)-C(71)-C(81)    | 126.13(12) | C(32)-C(42)-C(103)   | 121.42(14) |
| C(61)-C(71)-C(81)    | 112.71(12) | C(52)-C(42)-C(103)   | 121.03(14) |
| C(101)-C(81)-C(91)   | 107.33(14) | C(42)-C(52)-C(62)    | 122.40(13) |
| C(101)-C(81)-C(111)  | 108.30(17) | C(42)-C(52)-H(52)    | 118.8      |
| C(91)-C(81)-C(111)   | 105.12(14) | C(62)-C(52)-H(52)    | 118.8      |
| C(101)-C(81)-C(71)   | 106.30(13) | C(52)-C(62)-C(12)    | 118.74(13) |
| C(91)-C(81)-C(71)    | 118.85(13) | C(52)-C(62)-C(133)   | 118.81(12) |
| C(111)-C(81)-C(71)   | 110.56(13) | C(12)-C(62)-C(133)   | 122.45(12) |
| C(81)-C(91)-H(91A)   | 109.5      | C(22)-C(72)-C(92)    | 110.14(13) |
| C(81)-C(91)-H(91B)   | 109.5      | C(22)-C(72)-C(82)    | 111.65(13) |
| H(91A)-C(91)-H(91B)  | 109.5      | C(92)-C(72)-C(82)    | 110.96(15) |
| C(81)-C(91)-H(91C)   | 109.5      | C(22)-C(72)-H(72)    | 108.0      |
| H(91A)-C(91)-H(91C)  | 109.5      | C(92)-C(72)-H(72)    | 108.0      |
| H(91B)-C(91)-H(91C)  | 109.5      | C(82)-C(72)-H(72)    | 108.0      |
| C(81)-C(101)-H(10A)  | 109.5      | C(72)-C(82)-H(82A)   | 109.5      |
| C(81)-C(101)-H(10B)  | 109.5      | C(72)-C(82)-H(82B)   | 109.5      |
| H(10A)-C(101)-H(10B) | 109.5      | H(82A)-C(82)-H(82B)  | 109.5      |
| C(81)-C(101)-H(10C)  | 109.5      | C(72)-C(82)-H(82C)   | 109.5      |
| H(10A)-C(101)-H(10C) | 109.5      | H(82A)-C(82)-H(82C)  | 109.5      |

|                      |            |                      |            |
|----------------------|------------|----------------------|------------|
| H(82B)-C(82)-H(82C)  | 109.5      | H(14N)-C(142)-H(14O) | 109.5      |
| C(72)-C(92)-H(92A)   | 109.5      | C(132)-C(152)-H(15J) | 109.5      |
| C(72)-C(92)-H(92B)   | 109.5      | C(132)-C(152)-H(15K) | 109.5      |
| H(92A)-C(92)-H(92B)  | 109.5      | H(15J)-C(152)-H(15K) | 109.5      |
| C(72)-C(92)-H(92C)   | 109.5      | C(132)-C(152)-H(15L) | 109.5      |
| H(92A)-C(92)-H(92C)  | 109.5      | H(15J)-C(152)-H(15L) | 109.5      |
| H(92B)-C(92)-H(92C)  | 109.5      | H(15K)-C(152)-H(15L) | 109.5      |
| C(43)-C(102)-C(112)  | 110.72(14) | C(63)-C(13)-C(23)    | 119.59(13) |
| C(43)-C(102)-C(122)  | 112.19(14) | C(63)-C(13)-N(21)    | 122.21(12) |
| C(112)-C(102)-C(122) | 112.08(16) | C(23)-C(13)-N(21)    | 118.19(12) |
| C(43)-C(102)-H(102)  | 107.2      | C(33)-C(23)-C(13)    | 119.16(13) |
| C(112)-C(102)-H(102) | 107.2      | C(33)-C(23)-C(73)    | 118.18(13) |
| C(122)-C(102)-H(102) | 107.2      | C(13)-C(23)-C(73)    | 122.66(13) |
| C(102)-C(112)-H(11J) | 109.5      | C(43)-C(33)-C(23)    | 122.25(14) |
| C(102)-C(112)-H(11K) | 109.5      | C(43)-C(33)-H(33)    | 118.9      |
| H(11J)-C(112)-H(11K) | 109.5      | C(23)-C(33)-H(33)    | 118.9      |
| C(102)-C(112)-H(11L) | 109.5      | C(33)-C(43)-C(53)    | 117.61(13) |
| H(11J)-C(112)-H(11L) | 109.5      | C(33)-C(43)-C(102)   | 120.19(14) |
| H(11K)-C(112)-H(11L) | 109.5      | C(53)-C(43)-C(102)   | 122.19(14) |
| C(102)-C(122)-H(12G) | 109.5      | C(43)-C(53)-C(63)    | 122.60(14) |
| C(102)-C(122)-H(12H) | 109.5      | C(43)-C(53)-H(53)    | 118.7      |
| H(12G)-C(122)-H(12H) | 109.5      | C(63)-C(53)-H(53)    | 118.7      |
| C(102)-C(122)-H(12I) | 109.5      | C(53)-C(63)-C(13)    | 118.64(13) |
| H(12G)-C(122)-H(12I) | 109.5      | C(53)-C(63)-C(132)   | 118.75(13) |
| H(12H)-C(122)-H(12I) | 109.5      | C(13)-C(63)-C(132)   | 122.54(13) |
| C(63)-C(132)-C(152)  | 111.54(14) | C(93)-C(73)-C(23)    | 110.65(15) |
| C(63)-C(132)-C(142)  | 111.85(13) | C(93)-C(73)-C(83)    | 109.53(19) |
| C(152)-C(132)-C(142) | 108.22(14) | C(23)-C(73)-C(83)    | 112.09(15) |
| C(63)-C(132)-H(132)  | 108.4      | C(93)-C(73)-H(73)    | 108.2      |
| C(152)-C(132)-H(132) | 108.4      | C(23)-C(73)-H(73)    | 108.2      |
| C(142)-C(132)-H(132) | 108.4      | C(83)-C(73)-H(73)    | 108.2      |
| C(132)-C(142)-H(14M) | 109.5      | C(73)-C(83)-H(83A)   | 109.5      |
| C(132)-C(142)-H(14N) | 109.5      | C(73)-C(83)-H(83B)   | 109.5      |
| H(14M)-C(142)-H(14N) | 109.5      | H(83A)-C(83)-H(83B)  | 109.5      |
| C(132)-C(142)-H(14O) | 109.5      | C(73)-C(83)-H(83C)   | 109.5      |
| H(14M)-C(142)-H(14O) | 109.5      | H(83A)-C(83)-H(83C)  | 109.5      |

|                      |            |                      |            |
|----------------------|------------|----------------------|------------|
| H(83B)-C(83)-H(83C)  | 109.5      | H(14E)-C(143)-H(14F) | 109.5      |
| C(73)-C(93)-H(93A)   | 109.5      | C(133)-C(153)-H(15D) | 109.5      |
| C(73)-C(93)-H(93B)   | 109.5      | C(133)-C(153)-H(15E) | 109.5      |
| H(93A)-C(93)-H(93B)  | 109.5      | H(15D)-C(153)-H(15E) | 109.5      |
| C(73)-C(93)-H(93C)   | 109.5      | C(133)-C(153)-H(15F) | 109.5      |
| H(93A)-C(93)-H(93C)  | 109.5      | H(15D)-C(153)-H(15F) | 109.5      |
| H(93B)-C(93)-H(93C)  | 109.5      | H(15E)-C(153)-H(15F) | 109.5      |
| C(42)-C(103)-C(113)  | 110.88(15) | C(54)-N(14)-C(15)    | 123.47(12) |
| C(42)-C(103)-C(123)  | 111.81(14) | C(54)-N(14)-Fe(2)    | 118.61(10) |
| C(113)-C(103)-C(123) | 110.35(15) | C(15)-N(14)-Fe(2)    | 117.62(9)  |
| C(42)-C(103)-H(103)  | 107.9      | C(74)-N(24)-C(16)    | 120.53(12) |
| C(113)-C(103)-H(103) | 107.9      | C(74)-N(24)-Fe(2)    | 115.37(9)  |
| C(123)-C(103)-H(103) | 107.9      | C(16)-N(24)-Fe(2)    | 123.87(9)  |
| C(103)-C(113)-H(11M) | 109.5      | C(44)-C(14)-H(14J)   | 109.5      |
| C(103)-C(113)-H(11N) | 109.5      | C(44)-C(14)-H(14K)   | 109.5      |
| H(11M)-C(113)-H(11N) | 109.5      | H(14J)-C(14)-H(14K)  | 109.5      |
| C(103)-C(113)-H(11O) | 109.5      | C(44)-C(14)-H(14L)   | 109.5      |
| H(11M)-C(113)-H(11O) | 109.5      | H(14J)-C(14)-H(14L)  | 109.5      |
| H(11N)-C(113)-H(11O) | 109.5      | H(14K)-C(14)-H(14L)  | 109.5      |
| C(103)-C(123)-H(12J) | 109.5      | C(44)-C(24)-H(24A)   | 109.5      |
| C(103)-C(123)-H(12K) | 109.5      | C(44)-C(24)-H(24B)   | 109.5      |
| H(12J)-C(123)-H(12K) | 109.5      | H(24A)-C(24)-H(24B)  | 109.5      |
| C(103)-C(123)-H(12L) | 109.5      | C(44)-C(24)-H(24C)   | 109.5      |
| H(12J)-C(123)-H(12L) | 109.5      | H(24A)-C(24)-H(24C)  | 109.5      |
| H(12K)-C(123)-H(12L) | 109.5      | H(24B)-C(24)-H(24C)  | 109.5      |
| C(62)-C(133)-C(143)  | 108.87(13) | C(44)-C(34)-H(34A)   | 109.5      |
| C(62)-C(133)-C(153)  | 113.80(12) | C(44)-C(34)-H(34B)   | 109.5      |
| C(143)-C(133)-C(153) | 109.01(12) | H(34A)-C(34)-H(34B)  | 109.5      |
| C(62)-C(133)-H(133)  | 108.3      | C(44)-C(34)-H(34C)   | 109.5      |
| C(143)-C(133)-H(133) | 108.3      | H(34A)-C(34)-H(34C)  | 109.5      |
| C(153)-C(133)-H(133) | 108.3      | H(34B)-C(34)-H(34C)  | 109.5      |
| C(133)-C(143)-H(14D) | 109.5      | C(14)-C(44)-C(34)    | 106.52(14) |
| C(133)-C(143)-H(14E) | 109.5      | C(14)-C(44)-C(24)    | 106.19(15) |
| H(14D)-C(143)-H(14E) | 109.5      | C(34)-C(44)-C(24)    | 108.95(15) |
| C(133)-C(143)-H(14F) | 109.5      | C(14)-C(44)-C(54)    | 118.35(13) |
| H(14D)-C(143)-H(14F) | 109.5      | C(34)-C(44)-C(54)    | 110.57(13) |



|                      |            |                     |            |
|----------------------|------------|---------------------|------------|
| C(24)-C(44)-C(54)    | 105.93(13) | C(25)-C(15)-N(14)   | 118.68(12) |
| N(14)-C(54)-C(64)    | 121.14(13) | C(35)-C(25)-C(15)   | 118.54(13) |
| N(14)-C(54)-C(44)    | 127.20(13) | C(35)-C(25)-C(75)   | 119.07(13) |
| C(64)-C(54)-C(44)    | 111.57(13) | C(15)-C(25)-C(75)   | 122.39(13) |
| C(74)-C(64)-C(54)    | 133.47(13) | C(45)-C(35)-C(25)   | 122.54(13) |
| C(74)-C(64)-H(64)    | 113.3      | C(45)-C(35)-H(35)   | 118.7      |
| C(54)-C(64)-H(64)    | 113.3      | C(25)-C(35)-H(35)   | 118.7      |
| N(24)-C(74)-C(64)    | 122.34(13) | C(35)-C(45)-C(55)   | 117.51(13) |
| N(24)-C(74)-C(84)    | 124.86(13) | C(35)-C(45)-C(105)  | 119.99(13) |
| C(64)-C(74)-C(84)    | 112.80(13) | C(55)-C(45)-C(105)  | 122.42(13) |
| C(104)-C(84)-C(114)  | 106.78(18) | C(45)-C(55)-C(65)   | 122.30(13) |
| C(104)-C(84)-C(94)   | 108.14(15) | C(45)-C(55)-H(55)   | 118.9      |
| C(114)-C(84)-C(94)   | 106.00(17) | C(65)-C(55)-H(55)   | 118.9      |
| C(104)-C(84)-C(74)   | 110.47(14) | C(55)-C(65)-C(15)   | 118.74(13) |
| C(114)-C(84)-C(74)   | 116.42(13) | C(55)-C(65)-C(135)  | 119.46(12) |
| C(94)-C(84)-C(74)    | 108.67(13) | C(15)-C(65)-C(135)  | 121.80(12) |
| C(84)-C(94)-H(94A)   | 109.5      | C(25)-C(75)-C(95)   | 109.55(16) |
| C(84)-C(94)-H(94B)   | 109.5      | C(25)-C(75)-C(85)   | 112.91(14) |
| H(94A)-C(94)-H(94B)  | 109.5      | C(95)-C(75)-C(85)   | 109.73(15) |
| C(84)-C(94)-H(94C)   | 109.5      | C(25)-C(75)-H(75)   | 108.2      |
| H(94A)-C(94)-H(94C)  | 109.5      | C(95)-C(75)-H(75)   | 108.2      |
| H(94B)-C(94)-H(94C)  | 109.5      | C(85)-C(75)-H(75)   | 108.2      |
| C(84)-C(104)-H(10D)  | 109.5      | C(75)-C(85)-H(85A)  | 109.5      |
| C(84)-C(104)-H(10E)  | 109.5      | C(75)-C(85)-H(85B)  | 109.5      |
| H(10D)-C(104)-H(10E) | 109.5      | H(85A)-C(85)-H(85B) | 109.5      |
| C(84)-C(104)-H(10F)  | 109.5      | C(75)-C(85)-H(85C)  | 109.5      |
| H(10D)-C(104)-H(10F) | 109.5      | H(85A)-C(85)-H(85C) | 109.5      |
| H(10E)-C(104)-H(10F) | 109.5      | H(85B)-C(85)-H(85C) | 109.5      |
| C(84)-C(114)-H(11S)  | 109.5      | C(75)-C(95)-H(95A)  | 109.5      |
| C(84)-C(114)-H(11T)  | 109.5      | C(75)-C(95)-H(95B)  | 109.5      |
| H(11S)-C(114)-H(11T) | 109.5      | H(95A)-C(95)-H(95B) | 109.5      |
| C(84)-C(114)-H(11U)  | 109.5      | C(75)-C(95)-H(95C)  | 109.5      |
| H(11S)-C(114)-H(11U) | 109.5      | H(95A)-C(95)-H(95C) | 109.5      |
| H(11T)-C(114)-H(11U) | 109.5      | H(95B)-C(95)-H(95C) | 109.5      |
| C(65)-C(15)-C(25)    | 120.19(13) | C(45)-C(105)-C(125) | 113.91(13) |
| C(65)-C(15)-N(14)    | 121.06(12) | C(45)-C(105)-C(115) | 109.93(12) |

|                      |            |                     |            |
|----------------------|------------|---------------------|------------|
| C(125)-C(105)-C(115) | 110.69(14) | C(66)-C(16)-N(24)   | 119.24(12) |
| C(45)-C(105)-H(105)  | 107.3      | C(36)-C(26)-C(16)   | 119.03(12) |
| C(125)-C(105)-H(105) | 107.3      | C(36)-C(26)-C(76)   | 118.43(13) |
| C(115)-C(105)-H(105) | 107.3      | C(16)-C(26)-C(76)   | 122.52(12) |
| C(105)-C(115)-H(11D) | 109.5      | C(26)-C(36)-C(46)   | 122.38(14) |
| C(105)-C(115)-H(11E) | 109.5      | C(26)-C(36)-H(36)   | 118.8      |
| H(11D)-C(115)-H(11E) | 109.5      | C(46)-C(36)-H(36)   | 118.8      |
| C(105)-C(115)-H(11F) | 109.5      | C(56)-C(46)-C(36)   | 117.48(13) |
| H(11D)-C(115)-H(11F) | 109.5      | C(56)-C(46)-C(106)  | 121.50(13) |
| H(11E)-C(115)-H(11F) | 109.5      | C(36)-C(46)-C(106)  | 121.02(14) |
| C(105)-C(125)-H(12D) | 109.5      | C(46)-C(56)-C(66)   | 122.69(13) |
| C(105)-C(125)-H(12E) | 109.5      | C(46)-C(56)-H(56)   | 118.7      |
| H(12D)-C(125)-H(12E) | 109.5      | C(66)-C(56)-H(56)   | 118.7      |
| C(105)-C(125)-H(12F) | 109.5      | C(56)-C(66)-C(16)   | 118.47(13) |
| H(12D)-C(125)-H(12F) | 109.5      | C(56)-C(66)-C(136)  | 119.06(13) |
| H(12E)-C(125)-H(12F) | 109.5      | C(16)-C(66)-C(136)  | 122.30(12) |
| C(65)-C(135)-C(145)  | 110.39(12) | C(26)-C(76)-C(86)   | 109.64(11) |
| C(65)-C(135)-C(155)  | 112.71(12) | C(26)-C(76)-C(96)   | 114.05(12) |
| C(145)-C(135)-C(155) | 109.82(13) | C(86)-C(76)-C(96)   | 108.80(13) |
| C(65)-C(135)-H(135)  | 107.9      | C(26)-C(76)-H(76)   | 108.1      |
| C(145)-C(135)-H(135) | 107.9      | C(86)-C(76)-H(76)   | 108.1      |
| C(155)-C(135)-H(135) | 107.9      | C(96)-C(76)-H(76)   | 108.1      |
| C(135)-C(145)-H(14A) | 109.5      | C(76)-C(86)-H(86A)  | 109.5      |
| C(135)-C(145)-H(14B) | 109.5      | C(76)-C(86)-H(86B)  | 109.5      |
| H(14A)-C(145)-H(14B) | 109.5      | H(86A)-C(86)-H(86B) | 109.5      |
| C(135)-C(145)-H(14C) | 109.5      | C(76)-C(86)-H(86C)  | 109.5      |
| H(14A)-C(145)-H(14C) | 109.5      | H(86A)-C(86)-H(86C) | 109.5      |
| H(14B)-C(145)-H(14C) | 109.5      | H(86B)-C(86)-H(86C) | 109.5      |
| C(135)-C(155)-H(15A) | 109.5      | C(76)-C(96)-H(96A)  | 109.5      |
| C(135)-C(155)-H(15B) | 109.5      | C(76)-C(96)-H(96B)  | 109.5      |
| H(15A)-C(155)-H(15B) | 109.5      | H(96A)-C(96)-H(96B) | 109.5      |
| C(135)-C(155)-H(15C) | 109.5      | C(76)-C(96)-H(96C)  | 109.5      |
| H(15A)-C(155)-H(15C) | 109.5      | H(96A)-C(96)-H(96C) | 109.5      |
| H(15B)-C(155)-H(15C) | 109.5      | H(96B)-C(96)-H(96C) | 109.5      |
| C(26)-C(16)-C(66)    | 119.76(12) | C(46)-C(106)-C(116) | 112.45(13) |
| C(26)-C(16)-N(24)    | 120.94(12) | C(46)-C(106)-C(126) | 111.49(14) |

|                      |            |                      |           |
|----------------------|------------|----------------------|-----------|
| C(116)-C(106)-C(126) | 109.43(15) | H(17A)-C(17)-H(17B)  | 109.5     |
| C(46)-C(106)-H(106)  | 107.8      | C(27)-C(17)-H(17C)   | 109.5     |
| C(116)-C(106)-H(106) | 107.8      | H(17A)-C(17)-H(17C)  | 109.5     |
| C(126)-C(106)-H(106) | 107.8      | H(17B)-C(17)-H(17C)  | 109.5     |
| C(106)-C(116)-H(11G) | 109.5      | C(37)-C(27)-C(77)    | 117.7(5)  |
| C(106)-C(116)-H(11H) | 109.5      | C(37)-C(27)-C(17)    | 121.0(4)  |
| H(11G)-C(116)-H(11H) | 109.5      | C(77)-C(27)-C(17)    | 121.3(5)  |
| C(106)-C(116)-H(11I) | 109.5      | C(27)-C(37)-C(47)    | 120.9(4)  |
| H(11G)-C(116)-H(11I) | 109.5      | C(27)-C(37)-H(37)    | 119.5     |
| H(11H)-C(116)-H(11I) | 109.5      | C(47)-C(37)-H(37)    | 119.5     |
| C(106)-C(126)-H(12A) | 109.5      | C(57)-C(47)-C(37)    | 118.9(4)  |
| C(106)-C(126)-H(12B) | 109.5      | C(57)-C(47)-H(47)    | 120.5     |
| H(12A)-C(126)-H(12B) | 109.5      | C(37)-C(47)-H(47)    | 120.5     |
| C(106)-C(126)-H(12C) | 109.5      | C(67)-C(57)-C(47)    | 120.8(5)  |
| H(12A)-C(126)-H(12C) | 109.5      | C(67)-C(57)-H(57)    | 119.6     |
| H(12B)-C(126)-H(12C) | 109.5      | C(47)-C(57)-H(57)    | 119.6     |
| C(66)-C(136)-C(156)  | 114.37(12) | C(57)-C(67)-C(77)    | 118.8(4)  |
| C(66)-C(136)-C(146)  | 109.52(13) | C(57)-C(67)-H(67)    | 120.6     |
| C(156)-C(136)-C(146) | 108.90(13) | C(77)-C(67)-H(67)    | 120.6     |
| C(66)-C(136)-H(136)  | 108.0      | C(67)-C(77)-C(27)    | 122.8(5)  |
| C(156)-C(136)-H(136) | 108.0      | C(67)-C(77)-H(77)    | 118.6     |
| C(146)-C(136)-H(136) | 108.0      | C(27)-C(77)-H(77)    | 118.6     |
| C(136)-C(146)-H(14G) | 109.5      | C(27')-C(17')-H(17D) | 109.5     |
| C(136)-C(146)-H(14H) | 109.5      | C(27')-C(17')-H(17E) | 109.5     |
| H(14G)-C(146)-H(14H) | 109.5      | H(17D)-C(17')-H(17E) | 109.5     |
| C(136)-C(146)-H(14I) | 109.5      | C(27')-C(17')-H(17F) | 109.5     |
| H(14G)-C(146)-H(14I) | 109.5      | H(17D)-C(17')-H(17F) | 109.5     |
| H(14H)-C(146)-H(14I) | 109.5      | H(17E)-C(17')-H(17F) | 109.5     |
| C(136)-C(156)-H(15G) | 109.5      | C(37')-C(27')-C(77') | 117.7(11) |
| C(136)-C(156)-H(15H) | 109.5      | C(37')-C(27')-C(17') | 126.1(11) |
| H(15G)-C(156)-H(15H) | 109.5      | C(77')-C(27')-C(17') | 115.3(11) |
| C(136)-C(156)-H(15I) | 109.5      | C(27')-C(37')-C(47') | 122.5(12) |
| H(15G)-C(156)-H(15I) | 109.5      | C(27')-C(37')-H(37') | 118.7     |
| H(15H)-C(156)-H(15I) | 109.5      | C(47')-C(37')-H(37') | 118.7     |
| C(27)-C(17)-H(17A)   | 109.5      | C(57')-C(47')-C(37') | 116.7(12) |
| C(27)-C(17)-H(17B)   | 109.5      | C(57')-C(47')-H(47') | 121.7     |

|                      |            |
|----------------------|------------|
| C(37')-C(47')-H(47') | 121.7      |
| C(67')-C(57')-C(47') | 123.1(12)  |
| C(67')-C(57')-H(57') | 118.4      |
| C(47')-C(57')-H(57') | 118.4      |
| C(57')-C(67')-C(77') | 117.9(12)  |
| C(57')-C(67')-H(67') | 121.0      |
| C(77')-C(67')-H(67') | 121.0      |
| C(27')-C(77')-C(67') | 121.7(14)  |
| C(27')-C(77')-H(77') | 119.1      |
| C(67')-C(77')-H(77') | 119.1      |
| C(28)-C(18)-H(18A)   | 109.5      |
| C(28)-C(18)-H(18B)   | 109.5      |
| H(18A)-C(18)-H(18B)  | 109.5      |
| C(28)-C(18)-H(18C)   | 109.5      |
| H(18A)-C(18)-H(18C)  | 109.5      |
| H(18B)-C(18)-H(18C)  | 109.5      |
| C(38)-C(28)-C(78)    | 118.01(19) |
| C(38)-C(28)-C(18)    | 121.15(19) |
| C(78)-C(28)-C(18)    | 120.8(2)   |
| C(28)-C(38)-C(48)    | 121.24(19) |
| C(28)-C(38)-H(38A)   | 119.4      |
| C(48)-C(38)-H(38A)   | 119.4      |
| C(58)-C(48)-C(38)    | 119.8(2)   |
| C(58)-C(48)-H(48A)   | 120.1      |
| C(38)-C(48)-H(48A)   | 120.1      |
| C(48)-C(58)-C(68)    | 119.7(2)   |
| C(48)-C(58)-H(58A)   | 120.2      |
| C(68)-C(58)-H(58A)   | 120.2      |
| C(78)-C(68)-C(58)    | 120.1(2)   |
| C(78)-C(68)-H(68A)   | 119.9      |
| C(58)-C(68)-H(68A)   | 119.9      |
| C(68)-C(78)-C(28)    | 121.2(2)   |
| C(68)-C(78)-H(78A)   | 119.4      |
| C(28)-C(78)-H(78A)   | 119.4      |

---

**Table S6. Crystal data and structure refinement for L<sup>tBu</sup>FeNPhNPh**

|                                                     |                                                                                                                                  |
|-----------------------------------------------------|----------------------------------------------------------------------------------------------------------------------------------|
| Identification code                                 | holas19                                                                                                                          |
| Empirical formula                                   | C <sub>47</sub> H <sub>63</sub> Fe N <sub>4</sub>                                                                                |
| Formula weight                                      | 739.86                                                                                                                           |
| Temperature                                         | 100.0(1) K                                                                                                                       |
| Wavelength                                          | 0.71073 Å                                                                                                                        |
| Crystal system                                      | Monoclinic                                                                                                                       |
| Space group                                         | <i>C2/c</i>                                                                                                                      |
| Unit cell dimensions                                | $a = 22.938(4)$ Å $\alpha = 90^\circ$<br>$b = 10.2673(17)$ Å $\beta = 115.543(2)^\circ$<br>$c = 19.629(3)$ Å $\gamma = 90^\circ$ |
| Volume                                              | 4170.9(12) Å <sup>3</sup>                                                                                                        |
| <i>Z</i>                                            | 4                                                                                                                                |
| Density (calculated)                                | 1.178 g/cm <sup>3</sup>                                                                                                          |
| Absorption coefficient                              | 0.398 mm <sup>-1</sup>                                                                                                           |
| <i>F</i> (000)                                      | 1596                                                                                                                             |
| Crystal color, morphology                           | red-black, block                                                                                                                 |
| Crystal size                                        | 0.32 x 0.28 x 0.12 mm <sup>3</sup>                                                                                               |
| Theta range for data collection                     | 1.97 to 32.03°                                                                                                                   |
| Index ranges                                        | $-33 \leq h \leq 34, -13 \leq k \leq 15, -29 \leq l \leq 29$                                                                     |
| Reflections collected                               | 27124                                                                                                                            |
| Independent reflections                             | 7230 [ <i>R</i> (int) = 0.0331]                                                                                                  |
| Observed reflections                                | 5927                                                                                                                             |
| Completeness to theta = 32.03°                      | 99.6%                                                                                                                            |
| Absorption correction                               | Multi-scan                                                                                                                       |
| Max. and min. transmission                          | 0.9538 and 0.8833                                                                                                                |
| Refinement method                                   | Full-matrix least-squares on <i>F</i> <sup>2</sup>                                                                               |
| Data / restraints / parameters                      | 7230 / 0 / 243                                                                                                                   |
| Goodness-of-fit on <i>F</i> <sup>2</sup>            | 1.054                                                                                                                            |
| Final <i>R</i> indices [ <i>I</i> > 2σ( <i>I</i> )] | <i>R</i> 1 = 0.0384, <i>wR</i> 2 = 0.0965                                                                                        |
| <i>R</i> indices (all data)                         | <i>R</i> 1 = 0.0512, <i>wR</i> 2 = 0.1035                                                                                        |
| Largest diff. peak and hole                         | 1.008 and -0.228 e•Å <sup>-3</sup>                                                                                               |

**Table S7. Atomic coordinates ( $\times 10^4$ ) and equivalent isotropic displacement parameters ( $\text{\AA}^2 \times 10^3$ ) for  $\text{L}^{\text{tBu}}\text{FeNPhNPh}$ .**

|      | x       | y       | z       | Ueq   |
|------|---------|---------|---------|-------|
| Fe   | 0       | 4752(1) | 2500    | 13(1) |
| N1   | 317(1)  | 2976(1) | 2783(1) | 16(1) |
| C1   | 358(1)  | 2558(1) | 3492(1) | 17(1) |
| C2   | 952(1)  | 2704(1) | 4124(1) | 21(1) |
| C3   | 1026(1) | 2264(1) | 4826(1) | 26(1) |
| C4   | 524(1)  | 1636(1) | 4906(1) | 30(1) |
| C5   | -56(1)  | 1448(1) | 4276(1) | 28(1) |
| C6   | -145(1) | 1911(1) | 3572(1) | 21(1) |
| N11  | 720(1)  | 6028(1) | 2917(1) | 13(1) |
| C11  | 1161(1) | 8364(1) | 2944(1) | 15(1) |
| C21  | 622(1)  | 7318(1) | 2806(1) | 14(1) |
| C31  | 0       | 7863(2) | 2500    | 16(1) |
| C41  | 1872(1) | 7943(1) | 3365(1) | 19(1) |
| C51  | 1056(1) | 8809(1) | 2146(1) | 22(1) |
| C61  | 1084(1) | 9562(1) | 3376(1) | 23(1) |
| C12  | 1319(1) | 5524(1) | 3481(1) | 13(1) |
| C22  | 1713(1) | 4704(1) | 3279(1) | 16(1) |
| C32  | 2285(1) | 4239(1) | 3856(1) | 21(1) |
| C42  | 2453(1) | 4523(1) | 4608(1) | 23(1) |
| C52  | 2043(1) | 5275(1) | 4798(1) | 20(1) |
| C62  | 1473(1) | 5794(1) | 4245(1) | 15(1) |
| C72  | 1533(1) | 4310(1) | 2464(1) | 18(1) |
| C82  | 1766(1) | 2933(1) | 2408(1) | 23(1) |
| C92  | 1795(1) | 5268(1) | 2062(1) | 32(1) |
| C102 | 1036(1) | 6610(1) | 4482(1) | 18(1) |
| C112 | 1415(1) | 7467(1) | 5169(1) | 26(1) |
| C122 | 556(1)  | 5748(1) | 4628(1) | 31(1) |

**Table S8. Hydrogen coordinates ( $\times 10^4$ ) and isotropic displacement parameters ( $\text{\AA}^2 \times 10^3$ ) for  $\text{L}^{\text{tBu}}\text{FeNPhNPh}$ .**

|      | x    | y    | z    | U(eq) |
|------|------|------|------|-------|
| H2A  | 1304 | 3104 | 4072 | 25    |
| H3A  | 1426 | 2394 | 5256 | 32    |
| H4A  | 577  | 1337 | 5387 | 36    |
| H5A  | -398 | 998  | 4326 | 33    |
| H6A  | -547 | 1787 | 3145 | 25    |
| H31A | 0    | 8789 | 2500 | 19    |
| H41A | 1945 | 7160 | 3127 | 28    |

|      |      |       |      |    |
|------|------|-------|------|----|
| H41B | 1971 | 7753  | 3893 | 28 |
| H41C | 2153 | 8646  | 3345 | 28 |
| H51A | 1105 | 8061  | 1865 | 33 |
| H51B | 1376 | 9476  | 2190 | 33 |
| H51C | 620  | 9172  | 1878 | 33 |
| H61A | 1079 | 9277  | 3850 | 34 |
| H61B | 677  | 10008 | 3065 | 34 |
| H61C | 1446 | 10161 | 3486 | 34 |
| H32A | 2565 | 3715  | 3730 | 26 |
| H42A | 2847 | 4204  | 4991 | 28 |
| H52A | 2153 | 5441  | 5315 | 24 |
| H72A | 1051 | 4315  | 2187 | 22 |
| H82A | 1643 | 2335  | 2713 | 35 |
| H82B | 2237 | 2935  | 2596 | 35 |
| H82C | 1567 | 2648  | 1880 | 35 |
| H92A | 1600 | 6127  | 2036 | 48 |
| H92B | 1686 | 4954  | 1550 | 48 |
| H92C | 2265 | 5333  | 2344 | 48 |
| H10A | 779  | 7201  | 4051 | 21 |
| H11A | 1753 | 7939  | 5090 | 39 |
| H11B | 1615 | 6920  | 5620 | 39 |
| H11C | 1122 | 8092  | 5237 | 39 |
| H12A | 288  | 5269  | 4166 | 46 |
| H12B | 280  | 6294  | 4776 | 46 |
| H12C | 794  | 5130  | 5034 | 46 |

**Table S9. Bond lengths [Å] and angles [°] for L<sup>tBu</sup>FeNPhNPh**

|             |            |               |            |
|-------------|------------|---------------|------------|
| Fe-N(1)#1   | 1.9527(10) | C(11)-C(51)   | 1.5471(15) |
| Fe-N(1)     | 1.9527(10) | C(11)-C(21)   | 1.5701(15) |
| Fe-N(11)    | 1.9871(9)  | C(21)-C(31)   | 1.4045(12) |
| Fe-N(11)#1  | 1.9871(9)  | C(31)-C(21)#1 | 1.4045(12) |
| N(1)-N(1)#1 | 1.3976(18) | C(31)-H(31A)  | 0.9500     |
| N(1)-C(1)   | 1.4203(14) | C(41)-H(41A)  | 0.9800     |
| C(1)-C(6)   | 1.3974(16) | C(41)-H(41B)  | 0.9800     |
| C(1)-C(2)   | 1.3998(16) | C(41)-H(41C)  | 0.9800     |
| C(2)-C(3)   | 1.3894(17) | C(51)-H(51A)  | 0.9800     |
| C(2)-H(2A)  | 0.9500     | C(51)-H(51B)  | 0.9800     |
| C(3)-C(4)   | 1.388(2)   | C(51)-H(51C)  | 0.9800     |
| C(3)-H(3A)  | 0.9500     | C(61)-H(61A)  | 0.9800     |
| C(4)-C(5)   | 1.384(2)   | C(61)-H(61B)  | 0.9800     |
| C(4)-H(4A)  | 0.9500     | C(61)-H(61C)  | 0.9800     |
| C(5)-C(6)   | 1.3912(17) | C(12)-C(22)   | 1.4115(14) |

|                   |            |                     |            |
|-------------------|------------|---------------------|------------|
| C(5)-H(5A)        | 0.9500     | C(12)-C(62)         | 1.4121(14) |
| C(6)-H(6A)        | 0.9500     | C(22)-C(32)         | 1.3962(15) |
| N(11)-C(21)       | 1.3451(14) | C(22)-C(72)         | 1.5250(15) |
| N(11)-C(12)       | 1.4372(13) | C(32)-C(42)         | 1.3866(17) |
| C(11)-C(41)       | 1.5398(15) | C(32)-H(32A)        | 0.9500     |
| C(11)-C(61)       | 1.5466(16) | C(42)-C(52)         | 1.3860(17) |
| C(42)-H(42A)      | 0.9500     | N(1)#1-Fe-N(1)      | 41.94(5)   |
| C(52)-C(62)       | 1.3966(15) | N(1)#1-Fe-N(11)     | 150.93(4)  |
| C(52)-H(52A)      | 0.9500     | N(1)-Fe-N(11)       | 110.92(4)  |
| C(62)-C(102)      | 1.5247(15) | N(1)#1-Fe-N(11)#1   | 110.92(4)  |
| C(72)-C(82)       | 1.5322(17) | N(1)-Fe-N(11)#1     | 150.93(4)  |
| C(72)-C(92)       | 1.5345(18) | N(11)-Fe-N(11)#1    | 97.52(5)   |
| C(72)-H(72A)      | 1.0000     | N(1)#1-N(1)-C(1)    | 112.70(10) |
| C(82)-H(82A)      | 0.9800     | N(1)#1-N(1)-Fe      | 69.03(3)   |
| C(82)-H(82B)      | 0.9800     | C(6)-C(1)-C(2)      | 119.15(10) |
| C(82)-H(82C)      | 0.9800     | C(6)-C(1)-N(1)      | 122.98(10) |
| C(92)-H(92A)      | 0.9800     | C(2)-C(1)-N(1)      | 117.61(10) |
| C(92)-H(92B)      | 0.9800     | C(3)-C(2)-C(1)      | 119.99(12) |
| C(92)-H(92C)      | 0.9800     | C(1)-N(1)-Fe        | 114.85(7)  |
| C(102)-C(112)     | 1.5291(16) | C(1)-C(2)-H(2A)     | 120.0      |
| C(102)-C(122)     | 1.5323(17) | C(3)-C(2)-H(2A)     | 120.0      |
| C(102)-H(10A)     | 1.0000     | C(4)-C(3)-C(2)      | 120.71(12) |
| C(112)-H(11A)     | 0.9800     | C(4)-C(3)-H(3A)     | 119.6      |
| C(112)-H(11B)     | 0.9800     | C(2)-C(3)-H(3A)     | 119.6      |
| C(112)-H(11C)     | 0.9800     | C(5)-C(4)-C(3)      | 119.31(12) |
| C(122)-H(12A)     | 0.9800     | C(5)-C(4)-H(4A)     | 120.3      |
| C(122)-H(12B)     | 0.9800     | C(3)-C(4)-H(4A)     | 120.3      |
| C(122)-H(12C)     | 0.9800     | C(4)-C(5)-C(6)      | 120.78(12) |
|                   |            |                     |            |
| C(4)-C(5)-H(5A)   | 119.6      | C(11)-C(41)-H(41C)  | 109.5      |
| C(6)-C(5)-H(5A)   | 119.6      | H(41A)-C(41)-H(41C) | 109.5      |
| C(5)-C(6)-C(1)    | 119.99(12) | H(41B)-C(41)-H(41C) | 109.5      |
| C(5)-C(6)-H(6A)   | 120.0      | C(11)-C(51)-H(51A)  | 109.5      |
| C(1)-C(6)-H(6A)   | 120.0      | C(11)-C(51)-H(51B)  | 109.5      |
| C(21)-N(11)-C(12) | 121.11(9)  | H(51A)-C(51)-H(51B) | 109.5      |
| C(21)-N(11)-Fe    | 122.08(7)  | C(11)-C(51)-H(51C)  | 109.5      |
| C(12)-N(11)-Fe    | 115.35(7)  | H(51A)-C(51)-H(51C) | 109.5      |
| C(41)-C(11)-C(61) | 105.89(9)  | H(51B)-C(51)-H(51C) | 109.5      |
| C(41)-C(11)-C(51) | 107.05(9)  | C(11)-C(61)-H(61A)  | 109.5      |
| C(61)-C(11)-C(51) | 108.38(10) | C(11)-C(61)-H(61B)  | 109.5      |
| C(41)-C(11)-C(21) | 118.21(9)  | H(61A)-C(61)-H(61B) | 109.5      |
| C(61)-C(11)-C(21) | 111.82(9)  | C(11)-C(61)-H(61C)  | 109.5      |
| C(51)-C(11)-C(21) | 105.09(8)  | H(61A)-C(61)-H(61C) | 109.5      |



|                      |            |                      |            |
|----------------------|------------|----------------------|------------|
| N(11)-C(21)-C(31)    | 121.99(10) | H(61B)-C(61)-H(61C)  | 109.5      |
| N(11)-C(21)-C(11)    | 125.59(9)  | C(22)-C(12)-C(62)    | 121.17(10) |
| C(22)-C(12)-N(11)    | 120.91(9)  | C(72)-C(82)-H(82A)   | 109.5      |
| C(62)-C(12)-N(11)    | 117.74(9)  | C(72)-C(82)-H(82B)   | 109.5      |
| C(32)-C(22)-C(12)    | 117.90(10) | H(82A)-C(82)-H(82B)  | 109.5      |
| C(32)-C(22)-C(72)    | 119.64(10) | C(72)-C(82)-H(82C)   | 109.5      |
| C(12)-C(22)-C(72)    | 122.46(10) | H(82A)-C(82)-H(82C)  | 109.5      |
| C(42)-C(32)-C(22)    | 121.65(10) | H(82B)-C(82)-H(82C)  | 109.5      |
| C(42)-C(32)-H(32A)   | 119.2      | C(72)-C(92)-H(92A)   | 109.5      |
| C(22)-C(32)-H(32A)   | 119.2      | C(72)-C(92)-H(92B)   | 109.5      |
| C(52)-C(42)-C(32)    | 119.59(11) | H(92A)-C(92)-H(92B)  | 109.5      |
| C(52)-C(42)-H(42A)   | 120.2      | C(72)-C(92)-H(92C)   | 109.5      |
| C(32)-C(42)-H(42A)   | 120.2      | H(92A)-C(92)-H(92C)  | 109.5      |
| C(42)-C(52)-C(62)    | 121.33(10) | H(92B)-C(92)-H(92C)  | 109.5      |
| C(42)-C(52)-H(52A)   | 119.3      | C(62)-C(102)-C(112)  | 112.70(9)  |
| C(62)-C(52)-H(52A)   | 119.3      | C(62)-C(102)-C(122)  | 111.03(10) |
| C(52)-C(62)-C(12)    | 118.21(10) | C(112)-C(102)-C(122) | 110.47(10) |
| C(52)-C(62)-C(102)   | 119.41(9)  | C(62)-C(102)-H(10A)  | 107.5      |
| C(12)-C(62)-C(102)   | 122.37(9)  | C(112)-C(102)-H(10A) | 107.5      |
| C(22)-C(72)-C(82)    | 112.04(10) | C(122)-C(102)-H(10A) | 107.5      |
| C(22)-C(72)-C(92)    | 112.37(10) | C(102)-C(112)-H(11A) | 109.5      |
| C(82)-C(72)-C(92)    | 109.20(10) | C(102)-C(112)-H(11B) | 109.5      |
| C(22)-C(72)-H(72A)   | 107.7      | H(11A)-C(112)-H(11B) | 109.5      |
| C(82)-C(72)-H(72A)   | 107.7      | C(102)-C(112)-H(11C) | 109.5      |
| C(92)-C(72)-H(72A)   | 107.7      | H(11A)-C(112)-H(11C) | 109.5      |
| H(11B)-C(112)-H(11C) | 109.5      | C(31)-C(21)-C(11)    | 112.31(10) |
| C(102)-C(122)-H(12A) | 109.5      | C(21)#1-C(31)-C(21)  | 132.99(14) |
| C(102)-C(122)-H(12B) | 109.5      | C(21)#1-C(31)-H(31A) | 113.5      |
| H(12A)-C(122)-H(12B) | 109.5      | C(21)-C(31)-H(31A)   | 113.5      |
| C(102)-C(122)-H(12C) | 109.5      | C(11)-C(41)-H(41A)   | 109.5      |
| H(12A)-C(122)-H(12C) | 109.5      | C(11)-C(41)-H(41B)   | 109.5      |
| H(12B)-C(122)-H(12C) | 109.5      | H(41A)-C(41)-H(41B)  | 109.5      |

---

Symmetry transformations used to generate equivalent atoms:

#1 -x,y,-z+1/2

## Details on Reaction of [L<sup>tBu</sup>FeH]<sub>2</sub> with BEt<sub>3</sub>.

The iron(II) hydride dimer [L<sup>tBu</sup>Fe(μ-H)<sub>2</sub>FeL<sup>tBu</sup>] abstracts hydrocarbyl groups from BEt<sub>3</sub> to give L<sup>Me</sup>FeEt and L<sup>tBu</sup>Fe(μ-H)<sub>2</sub>BEt<sub>2</sub>. The most convenient synthesis of the dihydridoborate complex is the same as the synthesis of [L<sup>tBu</sup>FeH]<sub>2</sub>, but with a longer reaction time. An ORTEP diagram is given below, and details of the reaction will be reported separately.<sup>3</sup>

**L<sup>tBu</sup>Fe(μ-H)<sub>2</sub>BEt<sub>2</sub>.** A Schlenk flask was loaded with a mixture of L<sup>tBu</sup>FeCl (722 mg, 1.21 mmol) and KHBet<sub>3</sub> (167 mg, 1.21 mmol) in toluene (50 mL). The mixture was stirred at 80 °C for 18 h. Volatile materials were removed under vacuum and the residue was extracted with pentane (50 mL), filtered and concentrated to 10 mL. Crystallization at -26 °C gave dark red blocks (224 mg, 59%). <sup>1</sup>H NMR (500 MHz, C<sub>6</sub>D<sub>6</sub>): 71 (6H, BEt<sub>2</sub> CH<sub>3</sub>), 42 (1H, backbone), 35 (18H, backbone CH<sub>3</sub>), 16 (4H), -13 (12H, *i*Pr CH<sub>3</sub>), -61 (12H, *i*Pr CH<sub>3</sub>), -66 (4H), -89 (2H, *p*-H), -313 (4H) ppm. UV-vis (pentane): 333 (ε = 9.42 mM<sup>-1</sup>cm<sup>-1</sup>), 414 (ε = 6.82 mM<sup>-1</sup>cm<sup>-1</sup>), 597 (ε = 1.27 mM<sup>-1</sup>cm<sup>-1</sup>) nm. μ<sub>eff</sub>(C<sub>6</sub>D<sub>6</sub>, 25 °C): 5.7(1) μ<sub>B</sub>. Elem. Anal. Calcd for C<sub>39</sub>H<sub>65</sub>N<sub>2</sub>BFe: C, 74.52; H, 10.42; N, 4.46. Found: C, 74.60; H 10.20, ; N, 4.34.

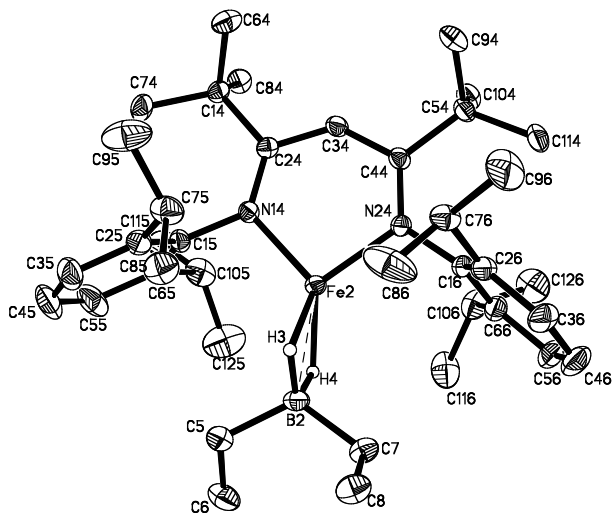

## References

- <sup>1</sup> Yamamoto, O.; Yanagisawa, M. *Anal. Chem.* **1970**, *42*, 1463-1465.
- <sup>2</sup> Smith, J. M.; Sadique, A. R.; Cundari, T. R.; Rodgers, K. R.; Lukat-Rodgers, G.; Lachicotte, R. J.; Flaschenriem, C. J.; Vela, J.; Holland, P. L. *J. Am. Chem. Soc.* **2006**, *128*, 756-769.
- <sup>3</sup> Yu, Y.; Brennessel, W. W.; Holland, P. L., submitted.
